## Article

# Stable Species Boundaries Despite Ten Million Years of Hybridization in Tropical Eels

Julia M. I. Barth<sup>1,12,13</sup>, Chrysoula Gubili<sup>2,13</sup>, Michael Matschiner<sup>3,4,13\*</sup>, Ole K. Tørresen<sup>4</sup>, Shun Watanabe<sup>5</sup>, Bernd Egger<sup>1</sup>, Yu-San Han<sup>6</sup>, Eric Feunteun<sup>7,8</sup>, Ruben Sommaruga<sup>9</sup>, Robert Jehle<sup>10,14\*</sup> and Robert Schabetsberger<sup>11,14\*</sup>

### Addresses:

<sup>1</sup>Zoological Institute, University of Basel, Basel, Switzerland.

<sup>2</sup>Fisheries Research Institute, Hellenic Agricultural Organisation-DEMETER, Nea Peramos, Kavala, Greece.

<sup>3</sup>Department of Palaeontology and Museum, University of Zurich, Zurich, Switzerland.

<sup>4</sup>Centre for Ecological and Evolutionary Synthesis, Department of Biosciences, University of Oslo, Oslo, Norway.

<sup>5</sup>Faculty of Agriculture, Kindai University, Nara, Japan.

<sup>6</sup>Institute of Fisheries Science, College of Life Science, National Taiwan University, Taipei, Taiwan.

<sup>7</sup>UMR Biologie des Organismes et Écosystèmes Aquatiques (BOREA UMR 7208), Muséum National d'Histoire Naturelle, Sorbonne Université, Université Pierre et Marie Curie, Université de Caen Normandie, Université des Antilles, CNRS, IRD, Paris, France.

<sup>8</sup>MNHN - Station Marine de Dinard, Centre de Recherche et d'Enseignement Sur les Systèmes Côtiers (CRESCO), Dinard, France.

<sup>9</sup>Department of Ecology, University of Innsbruck, Innsbruck, Austria.

<sup>10</sup>School of Environment and Life Sciences, University of Salford, Salford, UK.

<sup>11</sup>Department of Biosciences, University of Salzburg, Salzburg, Austria.

<sup>12</sup>Present address: Center for Active Learning (CAL), Department of Biology, ETH Zurich, Zurich, Switzerland.

<sup>13</sup>These first authors contributed equally: Julia M. I. Barth, Chrysoula Gubili, Michael Matschiner.

<sup>14</sup>These senior authors contributed equally: Robert Jehle, Robert Schabetsberger.

\*Corresponding author: E-mail: [michaelmatschiner@mac.com](mailto:michaelmatschiner@mac.com); [R.Jehle@salford.ac.uk](mailto:R.Jehle@salford.ac.uk); [robert.schabetsberger@sbg.ac.at](mailto:robert.schabetsberger@sbg.ac.at)

## 1 Abstract

2 Genomic evidence is increasingly underpinning that hybridization between taxa is commonplace,  
3 challenging our views on the mechanisms that maintain their boundaries. Here, we focus on seven  
4 catadromous eel species (genus *Anguilla*), and use genome-wide sequence data from more than 450  
5 individuals sampled across the tropical Indo-Pacific, morphological information, and three newly  
6 assembled draft genomes to compare contemporary patterns of hybridization with signatures of  
7 past gene flow across a time-calibrated phylogeny. We show that the seven species have remained  
8 distinct entities for up to 10 million years, despite a dynamic scenario of incomplete isolation  
9 whereby the current frequencies of hybridization across species pairs (over 5% of all individuals  
10 were either F1 hybrids or backcrosses) contrast remarkably with patterns of past introgression.  
11 Based on near-complete asymmetry in the directionality of hybridization and decreasing frequencies  
12 of later-generation hybrids, we identify cytonuclear incompatibilities and hybrid breakdown as two  
13 powerful mechanisms that can support species cohesion even when hybridization has been pervasive  
14 throughout the evolutionary history of entire clades.

15 **Keywords:** hybridization, introgression, speciation, genomics, reproductive barriers, cytonuclear  
16 incompatibilities, hybrid breakdown, purifying selection

## 17 Introduction

18 The turn of the century has witnessed a paradigm shift in how we view the role of hybridization  
19 for building up biological diversity. While hybridization was previously assumed to be spatially  
20 restricted and confined to a small number of taxa, it became gradually recognized that incomplete  
21 isolation of genomes is widespread across eukaryotes, with varied effects on adaptation and speci-  
22 ation (Mallet, 2005, 2007; Abbott et al., 2013; Taylor and Larson, 2019). More recently, this view  
23 has been further fuelled by technical and analytical advances which enable the quantification of past  
24 introgression, the genetic exchange through hybridization, across entire clades, revealing that it is  
25 often the most rapidly radiating clades that experienced high frequencies of gene exchange (Meier  
26 et al., 2017; Lamichhaney et al., 2018; Kozak et al., 2018; Edelman et al., 2018). This seemingly  
27 paradoxical association between introgression and rapid species proliferation underlies a key ques-  
28 tion in evolutionary biology: How can species in diversifying clades be accessible for introgression  
29 but nevertheless solidify their species boundaries? To answer this question, insights are required  
30 into the mechanisms that gradually reduce the degree to which hybridization generates introgres-  
31 sion; however, these mechanisms are still poorly understood because contemporary hybridization  
32 and past introgression have so far not been jointly studied and compared across multiple pairs of  
33 animal species with different divergence times within a single clade.

34 Teleost fish provide well-established model systems to reveal processes of diversification, includ-  
35 ing the impact of hybridization on speciation (e.g., Malinsky et al., 2018a; Hench et al. 2019).  
36 A particularly promising system for hybridization research are catadromous freshwater eels of the  
37 genus *Anguilla*, one of the most species-rich genera of eels with high economic value (Nelson et al.,

2016). These fishes are renowned for their unique population biology, whereby all individuals of a given species reproduce panmictically in one or only few oceanic spawning areas (Jacobsen et al., 2014; Pujolar and Maes, 2016). Moreover, spawning is temporally and spatially overlapping between multiple species, which therefore are expected to have great potential for interspecies mating (Avisé et al. 1990; Schabetsberger et al. 2015). Frequent occurrence of hybridization has in fact been demonstrated with genomic data for the two Atlantic *Anguilla* species (*A. anguilla* and *A. rostrata*), with a particularly high proportion of hybrids in Iceland (Albert et al. 2006; Gagnaire et al., 2012; Wielgoss et al., 2014; Pujolar and Maes, 2016). However, while these Atlantic species have so far received most of the scientific attention, the greatest concentration of *Anguilla* species is present in the tropical Indo-Pacific, where 11 species occur and may partially spawn at the same locations (Kuroki et al., 2012; Arai, 2016). A locally high frequency of hybrids between one of the species pairs in this region, *A. marmorata* and *A. megastoma*, has been suggested by microsatellites and small datasets of species-diagnostic single-nucleotide polymorphisms (SNPs) (Schabetsberger et al. 2015); however, the pervasiveness of hybridization across all tropical eel species, the degree to which hybridization leads to introgression in these species, and the mechanisms maintaining species boundaries have so far remained poorly known.

In the present paper, we use high-throughput sequencing and morphological analyses for seven species of tropical eels sampled across the Indo-Pacific to (i) infer their age and diversification history, (ii) determine the frequencies of contemporary hybridization between the species, and (iii) quantify signatures of past introgression among them. Our unique combination of approaches allows us to compare hybridization and introgression across multiple pairs of animal species with different ages and demonstrates how cytonuclear incompatibilities and hybrid breakdown can strengthen species boundaries in the face of frequent hybridization.

## Results

**Extensive sampling.** Collected in 13 field expeditions over the course of 14 years, our dataset included 456 individuals from 14 localities covering the distribution of anguillid eels in the tropical Indo-Pacific (Fig. 1a, Supplementary Table 1). Whenever possible, eels were tentatively identified morphologically in the field. Restriction-site-associated DNA (RAD) sequencing for all 456 individuals resulted in a comprehensive dataset of 704,480 RAD loci with a mean of 253.4 bp per locus and up to 1,518,299 SNPs, depending on quality-filtering options (Supplementary Figure 1). RAD sequences mapping to the mitochondrial genome unambiguously assigned all individuals to one of the seven tropical eel species *A. marmorata*, *A. megastoma*, *A. obscura*, *A. luzonensis*, *A. bicolor*, *A. interioris*, and *A. mossambica*, in agreement with our morphological assessment that indicated that the remaining four Indo-Pacific *Anguilla* species *A. celebesensis*, *A. bengalensis*, *A. borneensis*, and *A. reinhardtii* were not included in our dataset (Supplementary Figure 2). For those individuals for which sufficient morphological information was available ( $n = 161$ , restricted to *A. marmorata*, *A. megastoma*, *A. obscura*, and *A. interioris*), the measures predorsal length without head length (PDH) and distance between the origin of the dorsal fin and the anus (AD), size-standardized by total length (TL; Watanabe et al., 2009), revealed clear species-specific clusters but also interme-

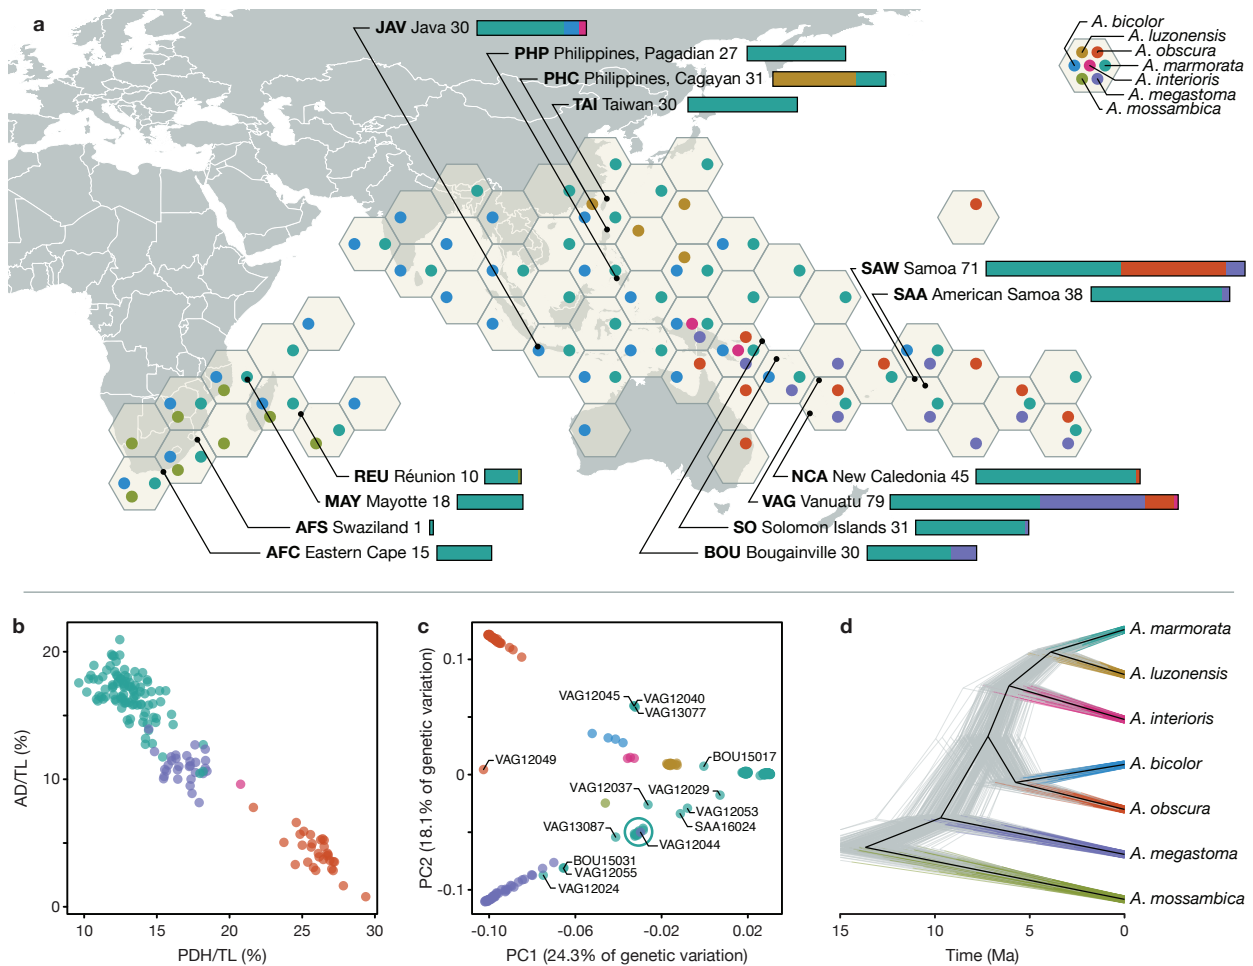

**Figure 1: Genomic and morphological variation in tropical eels.** a) Distribution of *Anguilla* species in the Indo-Pacific. The color and position of dots within hexagons indicate species presence within the region covered by the hexagon, according to the Global Biodiversity Information Facility database (GBIF.org 2019). Sampling locations are indicated with black dots. Numbers following location names specify the number of samples taken. Stacked bars indicate the species identities of individuals, according to mitochondrial and morphological species assignment. b) Morphological variation among the four species *A. marmorata* ( $n = 100$ ), *A. megastoma* ( $n = 30$ ), *A. obscura* ( $n = 30$ ), and *A. interioris* ( $n = 1$ ). Dots represent individuals and are colored according to mitochondrial species identity. c) Genomic PCA based on 155,896 variable sites. Specimen IDs are given for individuals with intermediate genotypes. The cyan circle indicates a cluster of 11 individuals mitochondrially assigned to *A. marmorata* (SAA16011, SAA16012, SAA16013, SAA16027, SAW17B27, SAW17B49, VAG12012, VAG12018, VAG12019, VAG13071, VAG13078), in addition to the highlighted VAG12044 which is mitochondrially assigned to *A. megastoma*. d) Time-calibrated phylogeny based on 5,000 transition sites. Each individual tree shown in gray represents a sample from the posterior tree distribution; a maximum-clade-credibility summary tree is shown in black. Color code in b), c), and d) is identical to a). PC: Principal component; AD: distance between the dorsal fin and the anus; PDH: predorsal length without head length; TL: total length.

77 diate individuals (Figure 1b, Supplementary Figure 3). This diagnosis was further supported by  
 78 principal-component analysis (PCA) of seven morphological characters (Supplementary Figure 3).  
 79 After excluding individuals with low-quality sequence data, the sample set used for genomic analy-  
 80 ses contained 430 individuals of the seven species, including 325 *A. marmorata*, 41 *A. megastoma*,  
 81 36 *A. obscura*, 20 *A. luzonensis*, 4 *A. bicolor*, 3 *A. interioris*, and 1 *A. mossambica* (Supplementary  
 82 Tables 2,3). The large number of individuals available for *A. marmorata*, *A. megastoma*, and *A.*

83 *obscura*, sampled at multiple sites throughout their geographic distribution (Fig. 1a; Supplemen-  
84 tary Table 1), permitted detailed analyses of genomic variation within these species (Supplementary  
85 Note 1). These analyses distinguished four populations in the geographically widespread species  
86 *A. marmorata* (Ishikawa et al., 2004; Minegishi et al., 2008; Watanabe et al., 2008; Gagnaire et  
87 al., 2011) but detected no population structure in *A. megastoma* and *A. obscura* (Supplementary  
88 Figure 4), that are both presumed to have a single spawning area in the western South Pacific  
89 (Schabetsberger et al., 2015, 2016).

90 **Deep divergences among tropical eel species.** To analyze genomic variation among tropi-  
91 cal eel species, we first performed PCA based on a dataset of 155,896 SNPs derived from RAD  
92 sequencing (Supplementary Figure 1). With few exceptions, the 430 individuals grouped accord-  
93 ing to species, and the seven species included in our dataset formed largely well-separated clusters  
94 (Fig. 1c, Supplementary Figure 5). Pairwise nuclear genetic distances between species ranged from  
95 0.0053 to 0.0116 (uncorrected *p*-distance; excluding individuals with intermediate genotypes) and  
96 were largest for *A. mossambica* (0.0103-0.0116), followed by *A. megastoma* (0.0079-0.0090; exclud-  
97 ing the comparison with *A. mossambica*, Supplementary Table 4). We further investigated the  
98 relationships among tropical eels species and their divergence times by applying Bayesian phyloge-  
99 netic inference to genome-wide SNPs (Stange et al., 2018), using the multi-species coalescent model  
100 implemented in the software SNAPP (Bryant et al., 2012). As SNAPP does not account for rate  
101 variation among substitution types, we performed separate analyses with transitions and transver-  
102 sions, both of which supported the same species-tree topology. In agreement with the pairwise  
103 genetic distances, *A. mossambica* appeared as the sister to a clade formed by all other species, and  
104 *A. megastoma* was resolved within this clade as the sister to a group formed by the species pair *A.*  
105 *bicolor* and *A. obscura* and the species trio *A. marmorata*, *A. luzonensis*, and *A. interioris*, with *A.*  
106 *marmorata* and *A. luzonensis* being most closely related within this trio (Fig. 1d, Supplementary  
107 Figure 6). Each node of this species tree received full Bayesian support (Bayesian posterior prob-  
108 ability, BPP, 1.0) regardless of whether transitions or transversions were used, and, except for the  
109 interrelationships of *A. marmorata*, *A. luzonensis*, and *A. interioris*, the tree agreed with previous  
110 phylogenies of mitochondrial sequences (Aoyama et al., 2001; Minegishi et al., 2005; Teng et al.,  
111 2009; Tseng, 2016, and references therein). Using a published age estimate for the divergence of  
112 *A. mossambica* (Jacobsen et al. 2014) to time calibrate the species tree, our analysis of transition  
113 SNPs with SNAPP showed that the clade combining all species except *A. mossambica* began to  
114 diverge around 9.7 Ma (divergence of *A. megastoma*; 95% HPD 11.7-7.7 Ma). This age estimate  
115 was robust to the use of transversions instead of transitions, alternative topologies enforced through  
116 constraints, and subsampling of taxa (Supplementary Figure 6).

117 To allow for the integration into other timelines of eel diversification based on multi-marker  
118 data (Rabosky et al., 2018; Musilova et al., 2019), we performed whole-genome sequencing (WGS)  
119 and generated new draft genome assemblies for *A. marmorata*, *A. megastoma*, and *A. obscura* (N50  
120 between 54,849 bp and 64,770 bp; Supplementary Table 5), and extracted orthologs of the markers  
121 used in the studies of Musilova et al. (2019) and Rabosky et al. (2018). The use of these combined  
122 datasets together with age calibrations from the two studies also had little effect on age estimates,

123 with the divergence of *A. megastoma* estimated around 6.5 Ma (95% HPD 7.2-5.8 Ma) or around  
124 15.5 Ma (17.0-13.8 Ma), respectively (Supplementary Figure 6). Thus, all our analyses of divergence  
125 times point to an age of the clade formed by *A. marmorata*, *A. megastoma*, *A. obscura*, *A. luzonensis*,  
126 *A. bicolor*, and *A. interioris* roughly on the order of 10 Ma.

127 **High frequency of contemporary hybridization.** Despite their divergence times up to around  
128 10 Ma, our genomic dataset revealed ongoing hybridization in multiple pairs of tropical eel species.  
129 Analyses of genomic variation with PCA revealed a number of individuals with genotypes inter-  
130 mediate to the main clusters formed by the seven species (Fig. 1c, Supplementary Figure 5). The  
131 same individuals also appeared admixed in maximum-likelihood ancestry inference with the software  
132 ADMIXTURE (Alexander et al., 2009; Supplementary Figure 7) and had high levels of coancestry  
133 with two other species in analyses of RAD haplotype similarity with the program fineRADstruc-  
134 ture, indicative of hybrid origin (Supplementary Figure 8; Malinsky et al., 2018b). For each of  
135 those putative hybrid individuals, we produced ancestry paintings (Runemark et al., 2018) based  
136 on sites that are fixed for different alleles in the parental species. In these ancestry paintings, the  
137 genotypes of the putative hybrids are assessed for those sites fixed between parents, with the ex-  
138 pectation that first-generation (F1) hybrids should be heterozygous at almost all of these sites, and  
139 backcrossed hybrids of the second generation should be heterozygous at about half of them. All of  
140 the putative hybrids were confirmed by the ancestry paintings, showing that our dataset includes  
141 20 hybrids between *A. marmorata* and *A. megastoma*, 3 hybrids between *A. marmorata* and *A.*  
142 *obscura*, 1 hybrid between *A. megastoma* and *A. obscura*, and 1 hybrid between *A. marmorata* and  
143 *A. interioris* (Fig. 2a-d, Supplementary Figures 9-12, Supplementary Tables 7). The frequency of  
144 hybrids in our dataset is thus 5.8% overall and up to 22.5% at the hybridization hotspot of Gaua,  
145 Vanuatu (Schabetsberger et al. 2015; Supplementary Figure 13, Supplementary Table 8). This  
146 high frequency is remarkable, given that most animal species produce hybrids at a frequency far  
147 below 1% (Mallet, 2005; Mallet et al., 2007). The heterozygosities of the hybrids are clearly bi-  
148 modal with a peak near 1 and another around 0.5 (Fig. 2i, Supplementary Table 7), supporting the  
149 presence of both first-generation hybrids as well as backcrossed second-generation hybrids. Using  
150 the mitochondrial genomes of hybrids as an indicator of their maternal species, we quantified the  
151 proportions of their nuclear genomes derived from the maternal species,  $f_{m,genome}$ , based on their  
152 genotypes at the fixed sites used for ancestry painting. The distribution of these  $f_{m,genome}$  values  
153 has three peaks centered around 0.25 (4 individuals), 0.5 (18 individuals), and 0.75 (3 individuals),  
154 suggesting that backcrossing has occurred about equally often with both parental species (Fig. 2j).  
155 In agreement with the interpretation of seven individuals as backcrossed second-generation hybrids,  
156 scaffolds represented by multiple sites in the ancestry painting largely showed the same pattern at  
157 all of these sites, indicating that recombination breakpoints are rare (Supplementary Figure 14).  
158 However, chromosome-length assemblies would be required to exclude the presence of more than  
159 two recombination breakpoints on the same chromosome, which would indicate that hybridization  
160 occurred more than two generations ago.

161 In their size-standardized overall morphology, all hybrids for which morphological information  
162 was available ( $n = 15$ ) were intermediate between the two parental species (Fig. 2e-h). Following

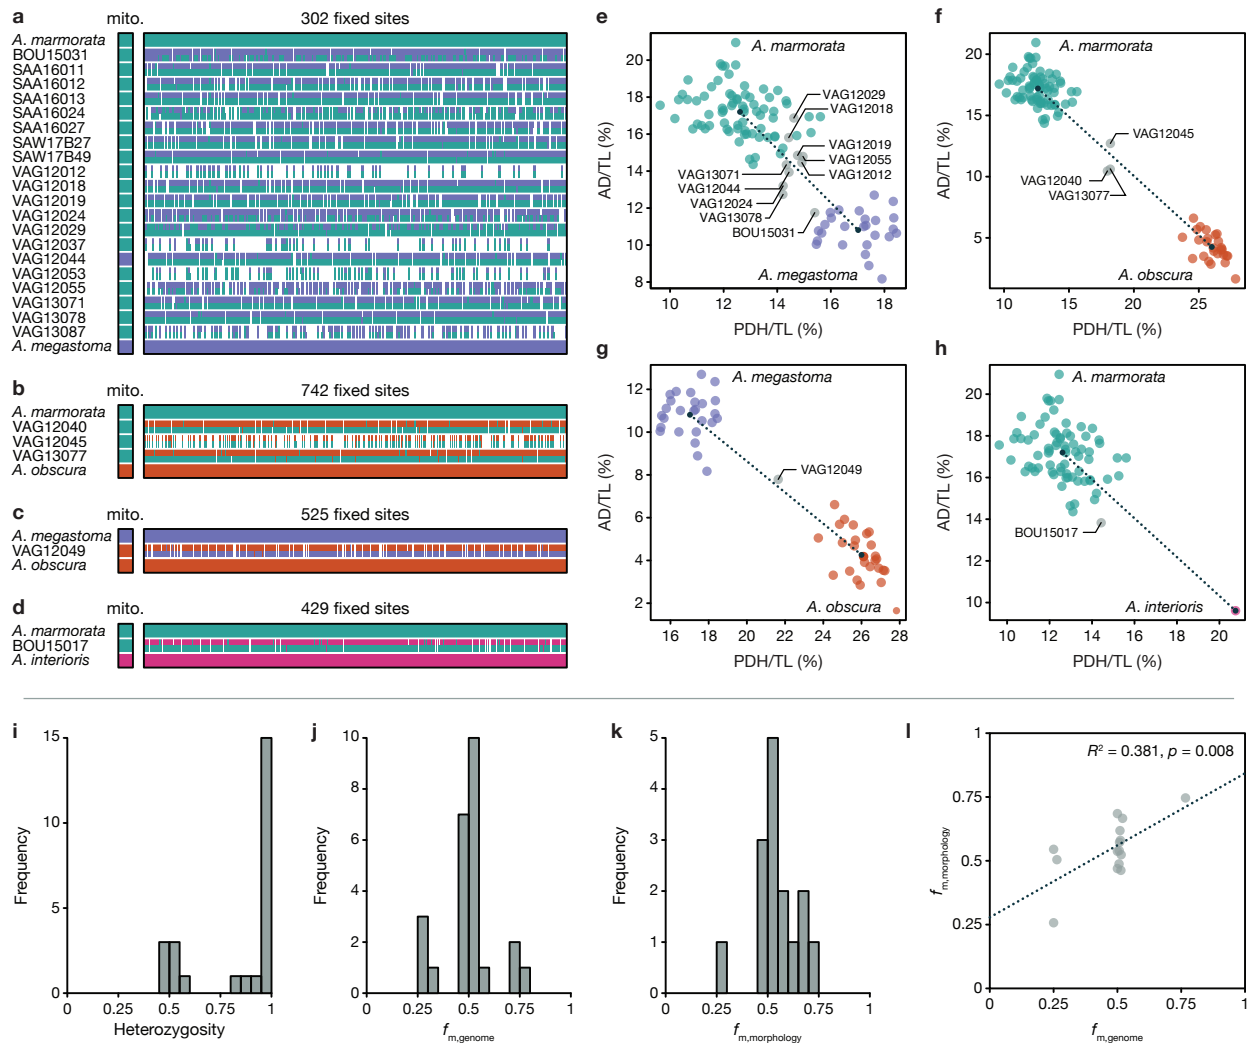

**Figure 2: Contemporary hybridization among tropical eels.** **a)** Ancestry painting for 20 hybrids between *A. marmorata* and *A. megastoma*. The top and bottom horizontal bars represent 302 sites that are fixed for different alleles between the two species; all other bars indicate the alleles at each of those sites. White color indicates missing data. Heterozygous alleles are shown with the top half in each bar matching the second parental species and vice versa. **b)** Ancestry painting for 3 contemporary hybrids between *A. marmorata* and *A. obscura*, based on 742 sites fixed between these two species. **c)** Ancestry painting for one hybrid between *A. megastoma* and *A. obscura*, based on 525 fixed sites. **d)** Ancestry painting for one hybrid between *A. marmorata* and *A. interioris*, based on 429 fixed sites. **e)** Morphological variation between *A. marmorata* and *A. megastoma*. Hybrids identified in **a)** are marked with specimen IDs. Mean phenotypes per species are marked with black dots that are connected by a dashed line **f-h)** as **e)** but for the hybrids identified in **b-d)**. **i)** Histogram of heterozygosity observed in hybrids. **j)** Histogram of the proportions of hybrid genomes derived from the maternal species (according to mitochondrial sequence data). **k)** Histogram of the relative morphological similarities between hybrids and the maternal species, measured as the relative proximity to the mean maternal phenotypes, compared to the proximity to the mean paternal phenotype. **l)** Comparison of the proportions of hybrids' genomes derived from the maternal species and the similarity to the mean maternal species' phenotype. The dotted line indicates a significant positive correlation between the two measures ( $p < 0.01$ ;  $R^2 = 0.381$ ). mito: mitochondrial genome; AD: distance between the dorsal fin and the anus; PDH: predorsal length without head; TL: total length.

163 Watanabe et al. (2009), we measured this overall morphology by the ratios AD/TL and PDH/TL,  
 164 where AD is the distance between the dorsal fin and the anus, TL is the total length, and PDH  
 165 is the predorsal length without the head. From these two ratios, we quantified the morphological

166 similarity of hybrids to their maternal species relative to their paternal species,  $f_{m,morphology}$ , as  
167 their position on an axis connecting the mean phenotypes of the two parental species. Similar to  
168 the distribution of  $f_{m,genome}$  values (Fig. 2j), the distribution of  $f_{m,morphology}$  values (Fig. 2k) also  
169 has three peaks centered close to 0.25, 0.5, and 0.75, even though these are less pronounced. In  
170 fact, the individuals with the lowest (BOU15031) and highest (VAG12029)  $f_{m,morphology}$  values also  
171 had the lowest and highest  $f_{m,genome}$  values, respectively (Supplementary Table 7), indicating that  
172 genomic similarity to parental species is correlated with morphological similarity (Fig. 2l).

173 In contrast to their intermediate size-standardized overall morphology, hybrids in some cases  
174 had certain transgressive characters, exceeding the range of the parental phenotypes (Rieseberg et  
175 al., 1999; Supplementary Figures 14,15). This was the case for the total length and the length  
176 of the pectoral fin in VAG13071 and VAG12044, two F1 hybrids between *A. marmorata* and *A.*  
177 *megastoma* that were sampled in two successive years in Gaua, Vanuatu (Supplementary Table 1;  
178 Supplementary Figure 15). With a TL of 139 and 142 cm, the sizes of the two hybrids exceeded  
179 those of 229 other individuals (counting *A. marmorata*, *A. megastoma*, and their hybrids) for which  
180 this information was available by at least four centimeters (3%). Under a null hypothesis of no  
181 relation between hybridization and transgression, the probability that the largest two individuals  
182 are among the 18 hybrids for which TL was measured is  $p = 18/231 \times 17/230 = 0.006$ ; thus,  
183 it appears that transgression resulting from complementary gene action in hybrids (Stelkens and  
184 Seehausen, 2009) is responsible for their large sizes (considering only individuals from Gaua to  
185 account for possible location-size effects, this probability is  $p = 11/69 \times 10/68 = 0.023$ ). As we  
186 observed transgression only in hybrids between *A. marmorata* and *A. megastoma* (Supplementary  
187 Figure 15), but not in the hybrids of the more recently diverged species pair *A. marmorata* and  
188 *A. obscura* (Supplementary Figure 16), our results are consistent with the predicted increase of  
189 transgression with genetic distance among parental species (Stelkens et al., 2009; Stelkens and  
190 Seehausen, 2009; Arntzen et al., 2018).

191 **Evidence of past introgression.** Multiple independent approaches revealed highly variable signa-  
192 tures of past introgression among species pairs of tropical eels. First, we found discordance between  
193 the Bayesian species trees based on the multi-species coalescent model (Fig. 1d) and an additional  
194 maximum-likelihood tree inferred with IQ-TREE (Nguyen et al., 2015; Supplementary Figure 17)  
195 from 1,360 concatenated RAD loci selected for high SNP density (Supplementary Figure 1). Even  
196 though both types of trees received full node support, their topologies differed in the position of *A.*  
197 *interioris*, which appeared next to *A. marmorata* and *A. luzonensis* in the Bayesian species trees  
198 (Fig. 1d, Supplementary Figure 6), but as the sister to *A. bicolor* and *A. obscura* in the maximum-  
199 likelihood tree, in agreement with mitochondrial phylogenies (Minegishi et al., 2005; Jacobsen et  
200 al., 2014). We applied an approach recently implemented in IQ-TREE (Minh et al., 2018) to assess  
201 per-locus and per-site concordance factors as additional measures of node support in the maximum-  
202 likelihood tree. These concordance factors were substantially lower than bootstrap-support values  
203 and showed that as few as 4.7% of the individual RAD loci and no more than 39.7% of all sites  
204 supported the position of *A. interioris* as the sister to *A. bicolor* and *A. obscura*.



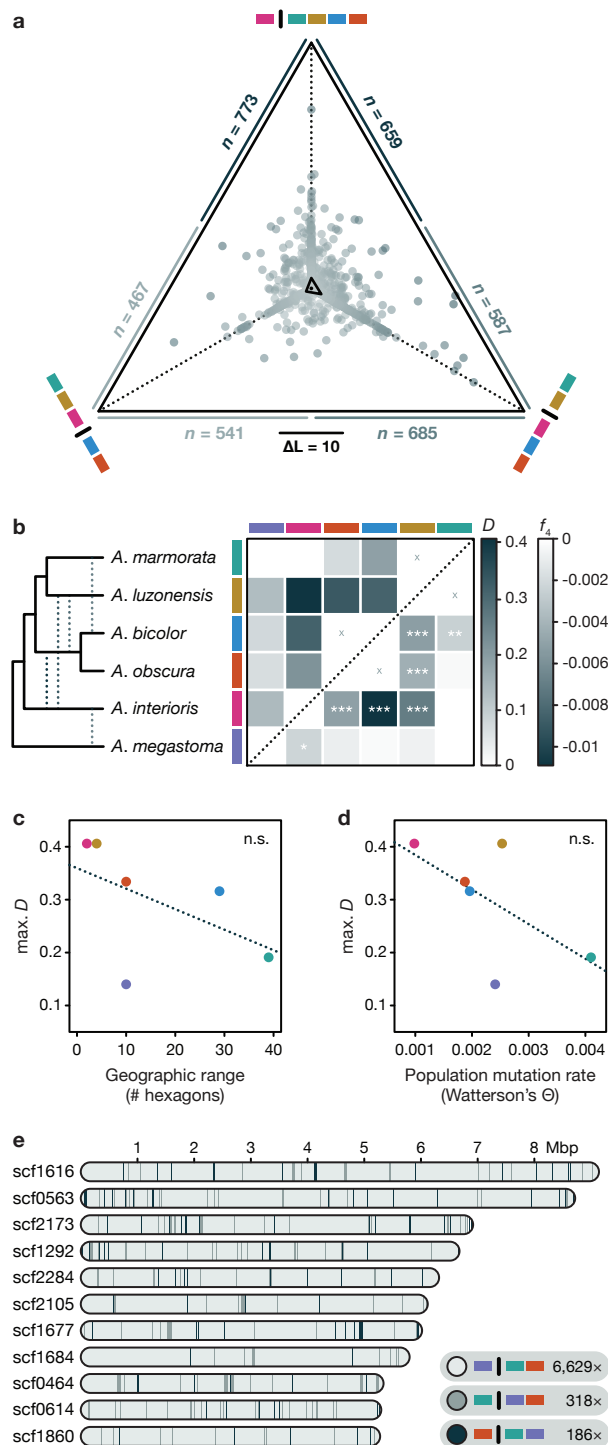

**Figure 3: Past introgression among tropical eels.** **a)** Likelihood support of individual RAD loci for different relationships of *A. interioris*: As sister to *A. marmorata* and *A. luzonensis* (bottom left), as sister to *A. obscura* and *A. bicolor* (bottom right), and as sister to a clade formed by those four species (top). The position of each dot shows the relative likelihood support of one RAD locus for each of the three tested relationships, with a distance corresponding to a log-likelihood difference of 10 indicated by the scale bar. The central triangle connects the mean relative likelihood support for each relationship. A black dot inside that triangle marks the central position corresponding to equal support for all three relationships. The two numbers outside each triangle edge report the number of loci that support each of the two competing relationships connected by that edge. **b)** Heatmap indicating maximum pairwise  $D$  (above diagonal) and  $f_4$  (below diagonal) statistics (see Table 1). Combinations marked with “x” symbols indicate sister taxa; introgression between these could not be assessed. Asterisks indicate the significance of  $f_4$  values (\*:  $p < 0.05$ ; \*\*:  $p < 0.01$ ; \*\*\*:  $p < 0.001$ ), estimated with the F4 software (Meyer et al., 2017). The cladogram on the left summarizes the species-tree topology according to **a)** and the significant signals of introgression according to **b)**. **c-d)** Comparisons of the maximum  $D$  value per species with the species’ geographic range or population mutation rate  $\Theta$ . Geographic range was measured as the number of geographic hexagons (see Fig. 1) in which the species is present, and Watterson’s estimator (Watterson, 1975) was used for the population mutation rate  $\Theta$ . n.s., not significant. **e)** Genomic patterns of phylogenetic relationships among *A. marmorata*, *A. obscura*, and *A. megastoma*, based on WGS reads mapped to the eleven largest scaffolds (those longer than 5 Mbp) of the *A. anguilla* reference genome. Blocks in light gray show 20,000-bp regions (incremented by 10,000 bp) in which *A. marmorata* and *A. obscura* appear as sister species, in agreement with the inferred species tree; in other blocks, *A. megastoma* appears closer to either *A. obscura* (gray) or *A. marmorata* (dark gray).

205 To further test whether the tree discordance is due to past introgression or other forms of model  
 206 misspecification, we applied genealogy interrogation (Arcila et al., 2017), comparing the likelihood  
 207 of different topological hypotheses for each of the 1,360 RAD loci (Fig. 3a). We find that neither  
 208 the topology of the Bayesian species trees nor the topology of the maximum-likelihood tree received

209 most support from genealogy interrogation. Instead, 773 loci (62% of the informative loci) had a  
210 better likelihood when *A. interioris* was the sister to a clade formed by *A. marmorata*, *A. luzonensis*,  
211 *A. bicolor*, and *A. obscura*, compared to the topology of the Bayesian species tree (*A. interioris* as  
212 the sister to *A. marmorata* and *A. luzonensis*; Fig. 1d). The position of *A. interioris* as the sister  
213 to the other four species also had a better likelihood than the topology of the maximum-likelihood  
214 tree (*A. interioris* as the sister to *A. bicolor* and *A. obscura*; Supplementary Figure 17) for 659  
215 loci (53% of the informative loci). We thus assumed that the topology supported by genealogy  
216 interrogation (with *A. interioris* being the sister to *A. marmorata*, *A. luzonensis*, *A. bicolor*, and *A.*  
217 *obscura*) is our best estimate of the true species-tree topology. However, we observed an imbalance  
218 in the numbers of loci supporting the two alternative topologies, as 541 loci had a better likelihood  
219 when *A. interioris* was the sister to *A. marmorata* and *A. luzonensis*, whereas 685 loci had a better  
220 likelihood when *A. interioris* was the sister to *A. bicolor* and *A. obscura* (Fig. 3a). As incomplete  
221 lineage sorting would be expected to produce equal support for both alternative topologies but the  
222 imbalance is too large to arise stochastically (exact binomial test  $p < 10^{-4}$ ), genealogy interrogation  
223 supports past introgression among *A. interioris*, *A. bicolor*, and *A. obscura*.

224 We further quantified both Patterson's  $D$  statistic (Green et al., 2010; Durand et al., 2011) and  
225 the  $f_4$  statistic (Reich et al., 2009) from biallelic SNPs, for all species quartets compatible with the  
226 species tree supported by genealogy interrogation. Both of these statistics are expected to be zero in  
227 the absence of introgression and thus support past introgression when they are found to differ from  
228 zero. As the distribution of these statistics is not usually normally-distributed across the genome  
229 (Meyer et al., 2017), we avoided block-jackknife resampling and instead assessed the significance  
230 of the  $f_4$  statistic with coalescent simulations in the software F4 (Meyer et al., 2017). We found  
231 that the  $f_4$  statistic was significant in no less than 29 out of 60 species quartets (Supplementary  
232 Table 9). The most extreme  $D$  and  $f_4$  values were observed in quartets in which *A. mossambica*  
233 was in the outgroup position, *A. marmorata* was in the position of the unadmixed species (P1), and  
234 *A. interioris* was in a position (P3) sharing gene flow with either *A. luzonensis* ( $D = 0.41$ ) or *A.*  
235 *bicolor* ( $f_4 = -0.011$ ) (P2). The sum of the analyses of  $D$  and  $f_4$  suggests pervasive introgression  
236 among tropical eel species (Table 1), with significant support for gene flow between *A. interioris*  
237 and each of the three species *A. luzonensis*, *A. bicolor*, *A. obscura*, and *A. megastoma*, between *A.*  
238 *luzonensis* and both *A. bicolor* and *A. obscura*, and between *A. marmorata* and *A. bicolor* (Fig.  
239 3b). While the pervasiveness of these signals prevents a clear resolution of introgression scenarios,  
240 the patterns could potentially be explained by a minimum of five introgression events: introgression  
241 between *A. megastoma* and *A. interioris*, between *A. interioris* and the common ancestor of *A.*  
242 *bicolor* and *A. obscura*, between *A. interioris* and *A. luzonensis*, between *A. luzonensis* and the  
243 common ancestor of *A. bicolor* and *A. obscura*, and between *A. bicolor* and *A. marmorata* (Fig.  
244 3b). The four different populations of *A. marmorata* all showed nearly the same signal of gene flow  
245 with *A. bicolor*, indicating that the introgression between these species predates the origin of the  
246 observed spatial within-species differentiation in *A. marmorata* (Supplementary Table 10).

247 Interestingly, it appears that the species with the most restricted geographic distributions —  
248 *A. interioris* and *A. luzonensis* — are those with the strongest signals of past introgression (Fig.  
249 3c), even though we identified only a single instance of contemporary hybridization involving one

| P1                   | P2                   | P3                   | $n$        | $C_{ABBA}$ | $C_{BABA}$ | $D$   | $f_4$   | $p$   |
|----------------------|----------------------|----------------------|------------|------------|------------|-------|---------|-------|
| <i>A. marmorata</i>  | <i>A. luzonensis</i> | <i>A. interioris</i> | 10,290     | 182.7      | 77.1       | 0.406 | -0.0070 | 0.000 |
| <i>A. marmorata</i>  | <i>A. luzonensis</i> | <i>A. obscura</i>    | 15,689     | 186.6      | 93.0       | 0.334 | -0.0043 | 0.000 |
| <i>A. marmorata</i>  | <i>A. bicolor</i>    | <i>A. interioris</i> | 7,772      | 266.3      | 138.4      | 0.316 | -0.0109 | 0.000 |
| <i>A. marmorata</i>  | <i>A. luzonensis</i> | <i>A. bicolor</i>    | 11,542     | 158.1      | 82.8       | 0.313 | -0.0052 | 0.000 |
| <i>A. marmorata</i>  | <i>A. obscura</i>    | <i>A. interioris</i> | 10,208     | 307.9      | 197.8      | 0.218 | -0.0051 | 0.000 |
| <i>A. obscura</i>    | <i>A. bicolor</i>    | <i>A. interioris</i> | 8,304      | 123.8      | 84.1       | 0.191 | -0.0030 | 0.005 |
| <i>A. obscura</i>    | <i>A. bicolor</i>    | <i>A. marmorata</i>  | 11,372     | 104.7      | 71.2       | 0.191 | -0.0025 | 0.002 |
| <i>A. obscura</i>    | <i>A. bicolor</i>    | <i>A. luzonensis</i> | 12,557     | 113.4      | 80.0       | 0.173 | -0.0022 | 0.008 |
| <i>A. marmorata</i>  | <i>A. interioris</i> | <i>A. megastoma</i>  | 9,951      | 96.4       | 72.7       | 0.140 | -0.0023 | 0.026 |
| <i>A. marmorata</i>  | <i>A. luzonensis</i> | <i>A. megastoma</i>  | 13,129     | 69.0       | 52.9       | 0.133 | -0.0008 | 0.201 |
| <i>A. luzonensis</i> | <i>A. marmorata</i>  | <i>A. bicolor</i>    | 14,675     | 105.4      | 84.5       | 0.110 | -0.0011 | 0.106 |
| <i>A. luzonensis</i> | <i>A. bicolor</i>    | <i>A. interioris</i> | 14,246     | 228.4      | 191.0      | 0.089 | -0.0015 | 0.062 |
| <i>A. luzonensis</i> | <i>A. interioris</i> | <i>A. megastoma</i>  | 13,632     | 82.4       | 70.2       | 0.080 | -0.0007 | 0.192 |
| <i>A. marmorata</i>  | <i>A. bicolor</i>    | <i>A. megastoma</i>  | 11,134     | 110.9      | 95.0       | 0.077 | -0.0003 | 0.430 |
| <i>A. luzonensis</i> | <i>A. marmorata</i>  | <i>A. obscura</i>    | 15,500     | 111.7      | 96.5       | 0.073 | -0.0003 | 0.406 |
| <i>A. marmorata</i>  | <i>A. obscura</i>    | <i>A. megastoma</i>  | 11,647     | 126.1      | 110.0      | 0.068 | -0.0009 | 0.241 |
| <i>A. bicolor</i>    | <i>A. obscura</i>    | <i>A. marmorata</i>  | 11,303     | 80.0       | 73.0       | 0.046 | -0.0007 | 0.261 |
| <i>A. obscura</i>    | <i>A. bicolor</i>    | <i>A. megastoma</i>  | 11,761     | 64.7       | 59.5       | 0.042 | -0.0002 | 0.447 |
| <i>A. bicolor</i>    | <i>A. obscura</i>    | <i>A. luzonensis</i> | 15,856     | 78.1       | 72.1       | 0.040 | -0.0010 | 0.141 |
| <i>A. obscura</i>    | <i>A. interioris</i> | <i>A. megastoma</i>  | 11,017     | 96.2       | 90.8       | 0.029 | -0.0011 | 0.137 |
| <i>A. luzonensis</i> | <i>A. bicolor</i>    | <i>A. megastoma</i>  | 14,602     | 97.0       | 93.1       | 0.020 | 0.0002  | 0.416 |
| <i>A. bicolor</i>    | <i>A. interioris</i> | <i>A. megastoma</i>  | 10,451     | 84.0       | 82.0       | 0.012 | -0.0007 | 0.213 |
| <i>A. luzonensis</i> | <i>A. obscura</i>    | <i>A. interioris</i> | 15,143     | 227.1      | 221.7      | 0.012 | 0.0005  | 0.300 |
| <i>A. luzonensis</i> | <i>A. obscura</i>    | <i>A. megastoma</i>  | 15,405     | 107.9      | 106.2      | 0.008 | -0.0001 | 0.461 |
| <i>A. obscura</i>    | <i>A. marmorata</i>  | <i>A. megastoma</i>  | 23,165,451 | 596786.0   | 587910.0   | 0.007 | —       | —     |

**Table 1: Past introgression supported by  $D$  and  $f_4$  statistics.** Only comparisons that are compatible with the inferred phylogenetic relationships and result in positive  $D$  values are shown (for all comparisons see Supplementary Table 9). All except the comparison in the last row are based on RAD-sequencing derived SNP data; the last comparison is based on WGS reads of a single individual of the three species. Either *A. mossambica*, *A. megastoma*, *A. interioris*, or *A. anguilla* (in the comparison based on WGS data) were used as outgroups and the comparison resulting in the largest  $D$  value is reported when multiple of these outgroups were used.  $n$ : number of sites variable among the included species;  $C_{ABBA}$ : number of sites at which species P2 and P3 share the derived allele;  $C_{BABA}$ : number of sites at which P1 and P3 share the derived allele.

250 of these species (the first-generation hybrid BOU15017 with an *A. marmorata* mother and an *A.*  
251 *interioris* father; Fig. 2). In contrast, *A. marmorata* and *A. megastoma*, which both have a high  
252 population mutation rate  $\Theta$  indicative of a large effective population size  $N_e$  (as  $\Theta = 4N_e\mu$ ), are  
253 those with the weakest signals of introgression (Fig. 3d) despite a high frequency of hybrids between  
254 them. While our sampling scheme does not allow us to exclude an effect of unequal sample sizes,  
255 this observation could be explained if introgressed alleles are over time more effectively purged by  
256 purifying selection from the genomes of species with larger effective population sizes (Harris and  
257 Nielsen, 2016; Juric et al., 2016). Particularly large effective population sizes in *A. marmorata* and  
258 *A. megastoma* are in fact supported by the WGS data produced for one individual of both species  
259 as well as *A. obscura*. When analyzed with the pairwise sequentially Markovian coalescent (PSMC;  
260 Li and Durbin, 2011), these data yielded estimates of a contemporary  $N_e$  between  $9.9 \times 10^4$  and  
261  $6.0 \times 10^5$  for *A. marmorata* and between  $2.3 \times 10^5$  and  $2.0 \times 10^6$  for *A. megastoma*, whereas a

262 comparatively lower  $N_e$  between  $3.4 \times 10^4$  and  $7.4 \times 10^4$  was estimated for the third species with  
263 WGS data, *A. obscura* (Supplementary Figure 18).

264 Low levels of introgression in the genomes of *A. marmorata* and *A. megastoma* were also sup-  
265 ported by these WGS data. Aligning the WGS reads of *A. marmorata*, *A. megastoma*, and *A.*  
266 *obscura* to the *A. anguilla* reference-genome assembly (Jansen et al., 2017) resulted in an alignment  
267 with 23,165,451 genome-wide SNPs. Based on these SNPs, and using *A. anguilla* as the outgroup,  
268 the  $D$  value supporting gene flow between *A. marmorata* and *A. megastoma* was only 0.007 (Table  
269 1). Phylogenetic analyses for 7,133 blocks of 20,000 bp, incremented by 10,000 bp, on the eleven  
270 largest scaffolds of the *A. anguilla* assembly showed that as many as 6,629 blocks (93%) support  
271 the species-tree topology, in which *A. marmorata* and *A. obscura* appear more closely related to  
272 each other than to *A. megastoma* (Fig. 3e). The alternative topologies with either *A. obscura* or  
273 *A. marmorata* being closer to *A. megastoma* were supported by 318 (4%) and 186 (3%) blocks,  
274 respectively. Notably, we did not observe long sets of adjacent blocks supporting the alternative  
275 topologies, which would be expected if the individuals had hybrids in their recent ancestry (Fu et  
276 al., 2015). The longest set of blocks supporting *A. marmorata* and *A. megastoma* as most closely  
277 related encompassed merely 80,000 bp (positions 4,890,000 to 4,970,000 on scaffold scf1677). While  
278 the lack of phasing information and a recombination map prevents a statistical test of time since  
279 admixture (Fu et al., 2015), the absence of longer sets of blocks most likely excludes hybrid ancestors  
280 within the last 10-20 generations.

## 281 Discussion

282 As species diverge, genetic incompatibilities accumulate (Bateson, 1909; Dobzhansky, 1936; Muller,  
283 1942) and reduce the viability of hybrids (Orr and Turelli, 2001). However, the absolute timescale  
284 on which hybrid inviability evolves vastly exceeds the ages of species in many diversifying clades,  
285 indicating that species boundaries in these groups are maintained by reproductive barriers that  
286 act after the F1 stage (Prager and Wilson, 1975; Coyne and Orr, 1989, 1997; Price and Bouvier,  
287 2002; Bolnick and Near, 2008; Arntzen et al., 2009; Stelkens et al., 2010, 2015). For anguillid eels,  
288 laboratory experiments have produced hybrids between several species pairs, including *A. anguilla*  
289 and *A. australis* (Burgerhout et al., 2011), *A. anguilla* and *A. japonica* (Okamura et al., 2004;  
290 Müller et al., 2012), and *A. australis* and *A. dieffenbachii* (Lokman and Young, 2000). These  
291 species pairs diverged in some of the earliest divergence events within the genus (Supplementary  
292 Figure 6), suggesting that the limits of hybrid viability are not reached in anguillid eels. Our  
293 observation of frequent hybridization in four different species pairs, including two pairs involving *A.*  
294 *megastoma* with a divergence time around 10 Ma (Fig. 1d), supports this conclusion in a natural  
295 system, indicating that prezygotic reproductive barriers may generally be weak in tropical eels.  
296 This interpretation is strengthened by the fact that the 25 hybrids in our dataset were sampled  
297 in five different years (Supplementary Table 7), suggesting that natural hybridization in tropical  
298 eels occurs continuously, rather than, for example, being the result of an environmental change that  
299 ephemerally caused spatially and temporally overlapping spawning (Pujolar et al., 2014). Moreover,  
300 the seven identified backcrosses demonstrate that hybrids, at least those between *A. marmorata* and

301 *A. megastoma*, can successfully reproduce naturally, indicating that, just like prezygotic barriers,  
302 postzygotic barriers are also incomplete in tropical eels, even after 10 million years of divergence.

303 Nevertheless, by considering both hybridization frequencies and introgression signals across mul-  
304 tiple species pairs, our analyses reveal how tropical eel species have succeeded to prevent species  
305 collapse (and even diversify) despite their great potential for genomic homogenization. First, with  
306 a single exception, all of the 24 hybrids with *A. marmorata* as a parental species possessed the  
307 mitochondrial genome of this species, indicating that it is almost exclusively female *A. marmorata*  
308 that are involved in successful hybridization events. This asymmetry extends to later generations,  
309 because all seven backcrosses had the *A. marmorata* mitochondrial genome, and thus the mother's  
310 mother must have been an *A. marmorata* for all backcrosses. Such asymmetry indicates differential  
311 viability of hybrids depending on the directionality of mating and could result from cytonuclear  
312 incompatibilities (Turelli and Moyle, 2007; Bolnick and Near, 2008; Arntzen et al., 2009; Gagnaire  
313 et al., 2012; Jacobsen et al., 2017). Second, the lower frequency of backcrosses compared to F1  
314 hybrids and the lack of both F2 hybrids and later-generation backcrosses also suggest decreased  
315 fitness of hybrids. This hypothesis is supported by the observation that the *A. marmorata* and  
316 *A. megastoma* individuals selected for WGS apparently did not have recent hybrid ancestors, even  
317 though these individuals were sampled at the hybridization hotspot of Gaua, Vanuatu, where over  
318 20% of all specimens are hybrids. Thus, it is possible that hybrid breakdown, affecting the viability  
319 and fertility of later-generation hybrids to a greater extent than F1 hybrids (Price and Bouvier,  
320 2002; Wiley et al., 2009; Stelkens et al., 2015), is common in tropical eels and reduces the amount of  
321 introgression generated by backcrossing. Finally, the degree of introgression present in the genomes  
322 of tropical eel species appears to depend more on their population sizes than their hybridization fre-  
323 quencies, which could suggest that most introgressed alleles are purged from the recipient species by  
324 purifying selection (Harris and Nielsen, 2016; Juric et al., 2016). The combination of these mecha-  
325 nisms may thus effectively reduce gene flow among tropical eels to a trickle that is not strong enough  
326 to break down species boundaries. Over the last 10 million years, this trickle might nevertheless  
327 have contributed to the evolutionary success of anguillid eels by providing the potential for adaptive  
328 introgression (Abbott et al., 2013; Marques et al., 2019), whenever environmental changes required  
329 it. The identification of signatures of such introgression based on population-level whole-genome  
330 resequencing in tropical eels will be a promising goal for future studies.

## 331 **Methods**

332 **Sample collection.** A total of 456 *Anguilla* specimens were obtained from 14 main localities over  
333 14 years (2003-2016, Fig. 1, Supplementary Table 1). Sampling localities included South Africa  
334 (AFC:  $n = 16$ ), Swaziland (AFS:  $n = 1$ ), Mayotte (MAY:  $n = 18$ ), Réunion (REU:  $n = 10$ ),  
335 Indonesia (JAV:  $n = 30$ ), Philippines (PHC/PHP:  $n = 58$ ), Taiwan (TAI:  $n = 30$ ), Bougainville  
336 Island (BOU:  $n = 30$ ), Solomon Islands (SOK/SOL/SON/SOR/SOV:  $n = 31$ ), Vanuatu (VAG:  
337  $n = 79$ ), New Caledonia (NCA:  $n = 45$ ), Samoa (SAW:  $n = 71$ ), and American Samoa (SAA:  
338  $n = 38$ ). Sampling was performed as described by Schabetsberger et al. (2015) and Gubili et al.  
339 (2019), targeting elvers, yellow eels, and silver eels by electrofishing and with handnets in estuaries,

340 rivers, and lakes. Small fin clips were extracted from the pectoral fin of each specimen and stored  
341 in 98% ethanol, to be used in subsequent genetic analyses. Permits were obtained prior to sampling  
342 from the responsible authorities.

343 **Morphological analyses.** Morphological variation was assessed based on the following measure-  
344 ments: total length (TL), weight, preanal length (PA), predorsal length (PD), head length (HL),  
345 mouth length, eye distance, eye size (horizontal and vertical), pectoral fin size, head width, and  
346 girth (Watanabe et al., 2009). We further calculated the distance between the anus and the dorsal  
347 fin ( $AD = PA - PD$ ), predorsal length without head length ( $PDH = PD - HL$ ), tail length ( $T = TL -$   
348  $PA$ ), and preanal length without head length ( $TR = PA - HL$ ). Morphological variation was assessed  
349 with PCA in the program JMP v.7.0 (SAS Institute Inc.; [www.jmp.com](http://www.jmp.com)) based on the ratios of PA,  
350 T, HL, TR, PD, PDH, and AD to TL; this analysis was performed for 161 individuals for which  
351 all measurements were available (100 *A. marmorata*, 30 *A. megastoma*, 30 *A. obscura*, and 1 *A. in-*  
352 *terioris*). Principal-component scores were used to delimit “core” groups of putatively unadmixed  
353 individuals for the three species *A. marmorata* (73 individuals), *A. megastoma* (26 individuals),  
354 and *A. obscura* (26 individuals). In addition to PCA, we plotted the ratios of AD and PDH to TL,  
355 which were found to be particularly diagnostic for *Anguilla* species (Watanabe et al., 2004).

356 **Sequencing and quality filtering.** Genomic DNA was extracted using the DNeasy Blood and  
357 Tissue Kit (Qiagen) as per the manufacturer’s instructions, or using a standard phenol chloroform  
358 procedure (Sambrook et al., 1989). DNA quality of each sample was evaluated on an agarose gel  
359 and quantified on a Qubit Fluorometer 2.0 (Thermo Fisher Scientific). Double-digest restriction-site  
360 associated DNA sequencing (ddRAD) was completed following Peterson et al. (2012) with minor  
361 modifications; this protocol is described in Supplementary Note 2.

362 Returned demultiplexed reads were processed using the software STACKS v.2.0-beta9 and v.2.2  
363 (Catchen et al., 2013), following the protocol described by Rochette and Catchen (2017). In brief,  
364 the reads were checked for correct cut sites and adaptor sequences using the “process\_radtags”  
365 tool and subsequently mapped against the European eel (*A. anguilla*) genome assembly (Jansen  
366 et al., 2017) using BWA MEM v.0.7.17 (Li and Durbin, 2009). As this assembly does not include  
367 the mitochondrial genome, mitochondrial reads were identified by separately mapping against the  
368 *A. japonica* mitochondrial genome (NCBI accession CM002536). Mapped reads were sorted and  
369 indexed using SAMTOOLS v.1.4 (Li, 2009, 2011). Species identification was verified for all indi-  
370 viduals by comparing mitochondrial sequences with the NCBI Genbank database using BLAST  
371 v.2.7.1 (Altschul et al., 1990). Individuals with low-quality sequence data (with a number of reads  
372 below 600,000, a number of mapped reads below 70%, or a proportion of singletons above 5%) were  
373 excluded ( $n = 26$ ). Variants were called using the “gstacks” tool, requiring a minimum mapping  
374 quality of 20 and an insert size below 500. Called variants were exported to variant call format  
375 (VCF) and haplotype format using the “populations” tool, allowing maximally 20% missing data  
376 and an observed heterozygosity below 75%, returning 1,518,299 SNPs.

377 The VCF file was further processed in two separate ways to generate suitable datasets for  
378 phylogenetic and population genetic analyses based on SNPs. For phylogenetic analyses, the VCF

379 file was filtered with BCFTOOLS v.1.6 (Li, 2011) to mask genotypes if the per-sample read depth  
380 was below 5 or above 50 or if the genotype quality was below 30. Sites were excluded from the  
381 dataset if they appeared no longer polymorphic after the above modifications, if genotypes were  
382 missing for 130 or more of the 460 individuals (30%), or if their heterozygosity was above 50%. The  
383 resulting VCF file contained 619,353 SNPs (Supplementary Figure 1).

384 For analyses of genomic variation within and among species, filtering was done using VCFTOOLS  
385 v.0.1.14 (Danecek et al., 2011) and PLINK v.1.9 (Purcell et al., 2007). Sites were excluded if the  
386 mean read depth was above 50, the minor allele frequency was below 0.02, or heterozygosity excess  
387 was supported with  $p < 0.05$  (rejecting the null hypothesis of no excess). In addition, individual  
388 genotypes were masked if they had a read depth below 5 or a genotype quality below 30. The  
389 resulting VCF file contained 155,896 SNPs (Supplementary Figure 1).

390 For each of the three species *A. marmorata*, *A. megastoma*, and *A. obscura*, one individual  
391 (VAG12030, VAG12032, and VAG12050, respectively) sampled in Gaua, Vanuatu, was subjected  
392 to WGS. Genomic DNA was extracted using the DNeasy Blood and Tissue Kit (Qiagen) according  
393 to the manufacturer's protocol. DNA quality was evaluated on an agarose gel and quantified on  
394 a Qubit Fluorometer 2.0 (Thermo Fisher Scientific). All samples were sequenced on an Illumina  
395 HiSeq X Ten system at Macrogen (Korea) with the TruSeq DNA PCR-Free library kit (350 bp  
396 insert size) using 150 bp paired-end reads.

397 **Genome assembly.** WGS reads for the three different species were error-corrected and trimmed  
398 for adapters with “merTrim” from the Celera Assembler software (Miller et al., 2008; downloaded  
399 from the CVS Concurrent Version System repository on 21 June 2017) using a k-mer size of 22 and  
400 the Illumina adapters option (Tørresen et al., 2017). Celera Assembler was run with the follow-  
401 ing options: merThreshold=0, merDistinct=0.9995, merTotal=0.995, unitigger=bogart, doOBT=0,  
402 doToggle=0; default settings were used for all other parameters. After assembly, the reads were  
403 mapped back to the assemblies using BWA MEM v.0.7.12, and consensus was recalled using Pilon  
404 v.1.22 (Walker et al., 2014). The completeness of the three different assemblies was assessed with  
405 BUSCO v.3.0.1 (Waterhouse et al., 2018) based on the vertebrate gene set.

406 **Analysis of mitochondrial haplotypes.** RAD-sequencing reads mapping to the mitochondrial  
407 genome were converted to FASTA format using SAMTOOLS v.1.3, BCFTOOLS v.1.6, and SE-  
408 QTK v.1.0 (<https://github.com/lh3/seqtk>). Sequences corresponding to regions 10,630–10,720 and  
409 12,015–12,105 of the *A. japonica* mitochondrial genome were aligned with default settings in MAFFT  
410 v.7.397 (Kato and Standley, 2013) and the two resulting alignments were concatenated. The ge-  
411 nealogy of mitochondrial haplotypes was reconstructed based on the GTRCAT substitution model  
412 in RAxML v.8.2.11 (Stamatakis, 2014) and used jointly with the concatenated alignment to produce  
413 a haplotype-genealogy graph with the software Fitchi v.1.1.4 (Matschiner, 2016).

414 **Species-tree inference.** To estimate a time-calibrated species tree for the seven sampled *Anguilla*  
415 species, we applied the Bayesian molecular-clock approach of Stange et al. (2018) to a subset of  
416 the dataset of 619,353 SNPs, containing data for the maximally five individuals per species with

417 the lowest proportions of missing data (28 individuals in total: 1 *A. mossambica*, 3 *A. interioris*, 4  
418 *A. bicolor*, and 5 of each remaining species). By employing the SNAPP v.1.3 (Bryant et al., 2012)  
419 package for the program BEAST 2 v.2.5.0 (Bouckaert et al., 2019), the approach of Stange et al.  
420 (2018) integrates over all possible trees at each SNP and therefore allows accurate phylogenetic  
421 inference in the presence of incomplete lineage sorting. As the SNAPP model assumes a single rate  
422 of evolution for all substitution types, all SNAPP analyses were conducted separately for transitions  
423 and transversions. A maximum of 5,000 SNPs was used in both cases to reduce run times of the  
424 computationally demanding SNAPP analyses. After exploratory analyses unambiguously supported  
425 a position of *A. mossambica* outside of the other six sampled anguillid species, the root of the species  
426 tree was calibrated according to published estimates for the divergence time of *A. mossambica*.  
427 Specifically, we constrained this divergence to 13.76 Ma (with a standard deviation of 0.1 myr), as  
428 reported by Jacobsen et al. (2014) based on mitochondrial genomes of 15 anguillid species and three  
429 outgroup species. A justification of this timeline is given in Supplementary Note 3. Five replicate  
430 Markov-chain Monte Carlo (MCMC) analyses were conducted and convergence was confirmed with  
431 effective sample sizes (ESS) greater than 200, measured with the software Tracer v.1.7 (Rambaut  
432 et al., 2018). The posterior distributions of run replicates were merged after discarding the first  
433 10% of each MCMC as burn-in, and maximum-clade-credibility (MCC) trees with node heights  
434 set to mean age estimates were generated with TreeAnnotator (Heled and Bouckaert, 2013). The  
435 robustness of divergence-time estimates was tested in a series of additional analyses, in which (i)  
436 alternative topologies were specified to fix the position of *A. interioris* (see below), (ii) species with  
437 strong signals of past introgression, *A. luzonensis* and *A. interioris* (see below), were excluded, (iii)  
438 genome assemblies of *A. marmorata*, *A. obscura*, and *A. megastoma* were used in combination with  
439 sequences and age constraints from Musilova et al. (2019), or (iv) mitochondrial sequences for the  
440 same three species were used jointly with sequences and age constraints from Rabosky et al. (2018).  
441 A full description of these additional analyses is presented in Supplementary Note 4.

442 The relationships among the seven sampled species *A. marmorata*, *A. luzonensis*, *A. bicolor*,  
443 *A. obscura*, *A. interioris*, *A. megastoma*, and *A. mossambica* were further investigated based on  
444 maximum likelihood, using the software IQ-TREE (Nguyen et al., 2015) and the same 28 individuals  
445 as in SNAPP analyses. RAD loci were filtered to exclude those with completely missing sequences  
446 and those with fewer than 20 (19,276 loci) or more than 40 variable sites (1 locus). The resulting  
447 dataset contained sequences from 1,360 loci with a total length of 393,708 bp and 0.18% of missing  
448 data (Supplementary Figure 1). The maximum-likelihood phylogeny was estimated from this set  
449 of loci with IQ-TREE's edge-linked proportional-partition model that automatically selects the  
450 best-fitting substitution model for each locus. Node support was estimated with three separate  
451 measures: 1,000 ultrafast bootstrap-approximation replicates (Hoang et al., 2018) and gene- and  
452 site-specific concordance factors (Minh et al., 2018). These two types of concordance factors quantify  
453 the percentage of loci and sites, respectively, that support a given branch, and thus are a useful  
454 complement to bootstrap support values that are known to often overestimate confidence with  
455 phylogenomic data (Liu et al., 2015).



456 **Assessing genomic variation among and within species.** Genome-wide variation was esti-  
457 mated based on the dataset of 155,896 SNPs, after excluding sites linked within 10-kb windows  
458 with  $R^2 > 0.8$  (Supplementary Figure 1). We performed PCA using smartPCA in EIGENSOFT  
459 v.6.0.1 (Patterson et al., 2006), including the function “lsqproject” to account for missing data, and  
460 through model-based clustering using ADMIXTURE v.1.3 (Alexander et al., 2009). Five replicates,  
461 each testing for one to eight clusters ( $K$ ) and 10-fold cross-validation was performed.

462 The software fineRADstructure v.0.3.1 (Malinsky et al., 2018b) was used to infer genomic vari-  
463 ation among individuals by clustering them according to similarity of their RAD haplotypes in a  
464 coancestry matrix. Haplotypes were exported using “populations” in Stacks (see above), addition-  
465 ally filtering for a minor allele frequency above 0.02 and a mean log likelihood greater than -10.0.  
466 The script “Stacks2fineRAD.py” (Malinsky et al., 2018b) was used to convert haplotypes of loci  
467 with maximally 20 variable sites to the fineRADstructure input format, resulting in a set of hap-  
468 lotypes for 65,912 RAD loci (Supplementary Figure 1). The coancestry matrix was inferred using  
469 RADpainter, and the MCMC clustering algorithm in fineSTRUCTURE v.4 (Lawson et al., 2012)  
470 was used to infer clusters of shared ancestry, setting the number of burnin iterations to 100,000, the  
471 sample iterations to 100,000, and the thinning interval to 1,000. Finally, to reflect the relationships  
472 within the co-ancestry matrix, the inferred clusters were arranged according to a tree inferred with  
473 fineSTRUCTURE, using 100,000 hill-climbing iterations and allowing all possible tree comparisons.

**Detecting contemporary hybridization.** Based on the results of morphological and genomic  
PCA (Fig. 1, Supplementary Figures 3,5), analyses with ADMIXTURE (Supplementary Figure 7)  
and fineRADstructure (Supplementary Figure 8), and previous reports (Schabetsberger et al., 2015;  
Gubili et al., 2019), we suspected that our dataset included recent hybrids between four species pairs:  
*A. marmorata* and *A. megastoma*, *A. marmorata* and *A. obscura*, *A. megastoma* and *A. obscura*,  
and *A. marmorata* and *A. interioris*. To verify these putative hybrids, we determined sites that  
were fixed in each of the four species pairs, considering only the “core”-group individuals for *A.*  
*marmorata*, *A. megastoma*, and *A. obscura* (see section “Morphological analyses”; 73, 26, and 26  
individuals, respectively) and the three available individuals for *A. interioris* (Supplementary Table  
1). At each fixed site for which no more than 20% of genotypes were missing, we then assessed the  
genotypes of the putative hybrids and plotted these in the form of “ancestry paintings” (Runemark  
et al., 2018). We expected that first-generation (F1) hybrids would be consistently heterozygous  
at nearly all sites fixed for different alleles between parental species (some few loci that appear  
fixed between the sampled individuals of the parental species might not be entirely fixed in those  
species), and that backcrossed individuals would show a heterozygosity ( $h_{\text{fixed}}$ ) of around 50% or  
less at these sites. For each verified F1 or backcrossed hybrid, we further quantified the proportion  
of its genome derived from the maternal species,  $f_{\text{m,genome}}$ , based on its genotypes at the sites fixed  
between parents and assuming that its mitochondrial genome reliably indicates the species of its  
mother. Finally, we also quantified the relative morphological similarity to the maternal species,  
 $f_{\text{m,morphology}}$ , for each hybrid, corresponding to the position of the hybrid on an axis connecting  
the mean morphology of the maternal species with the mean morphology of the paternal species.

Specifically we calculated this relative similarity as

$$f_{m,morphology} = 1 - \frac{1}{2} \left( \frac{\overline{PDH/TL} - \overline{PDH/TL}_m}{\overline{PDH/TL}_p - \overline{PDH/TL}_m} + \frac{\overline{AD/TL} - \overline{AD/TL}_m}{\overline{AD/TL}_p - \overline{AD/TL}_m} \right)$$

474 where  $\overline{PDH/TL}_m$  is the mean PDH divided by TL of the maternal species,  $\overline{PDH/TL}_p$  is the  
475 mean PDH divided by TL of the paternal species,  $\overline{AD/TL}_m$  is the mean AD divided by TL of the  
476 maternal species, and  $\overline{AD/TL}_p$  is the mean AD divided by TL of the paternal species.

477 **Detecting past introgression.** As our analyses of contemporary hybridization identified several  
478 backcrossed individuals, we assumed that, despite their old divergence times, tropical eel species  
479 may have remained connected by continuous or episodic gene flow. We thus tested for signals of past  
480 introgression among the seven species using multiple complementary approaches. Our first approach  
481 was motivated by the observation that *A. interioris* clustered with *A. marmorata* and *A. luzonensis*  
482 in the Bayesian species-tree analyses with SNAPP, but appeared as the sister to *A. bicolor* and  
483 *A. obscura* in the maximum-likelihood phylogeny generated with IQ-TREE, with strong support  
484 in both cases. Assuming that this discordance might have resulted from past introgression (e.g.,  
485 Martin et al., 2019), we thus applied genealogy interrogation (Arcila et al., 2017) to the dataset used  
486 for IQ-TREE analyses, composed of 1,360 RAD loci with a total length of 393,708 bp. For each of  
487 these loci, we separately calculated the likelihood of three different topological hypotheses (H1-H3):  
488 *A. interioris* forming a monophyletic group with *A. marmorata* and *A. luzonensis* to the exclusion of  
489 *A. bicolor* and *A. obscura* (H1), *A. interioris* forming a monophyletic group with *A. bicolor* and *A.*  
490 *obscura* to the exclusion of *A. marmorata* and *A. luzonensis* (H2), or *A. marmorata*, *A. luzonensis*,  
491 *A. bicolor*, and *A. obscura* forming a monophyletic group to the exclusion of *A. interioris* (H3).  
492 These likelihood calculations were performed using IQ-TREE with the GTR substitution model,  
493 and two replicate analyses were conducted for each combination of locus and hypothesis. Per locus,  
494 we then compared the three resulting likelihoods and quantified the numbers of loci supporting H1  
495 over H2, H2 over H1, H1 over H3, H3 over H1, H2 over H3, and H3 over H2. We expected that the  
496 true species-tree topology would be supported by the largest number of loci, and that introgression  
497 would, if present, increase the support for one of the alternative hypotheses relative to the other  
498 (Schumer et al., 2016, Meyer et al. 2017).

As a second approach for the detection of past introgression, we calculated Patterson's *D* statistic (Green et al., 2010; Durant et al., 2011) from biallelic SNPs included in the RAD-sequencing derived dataset of 619,353 SNPs (Supplementary Table 1). As this statistic is applicable to quartets of species in which one is the outgroup to all others and two species (labeled P1 and P2) are sister taxa, we calculated the *D* statistic separately for all species quartets compatible with the species tree inferred through genealogy interrogation. In this species tree, *A. mossambica* is the sister to all other species and *A. interioris* is the sister to a clade formed by the two species pairs *A. marmorata* and *A. luzonensis* and *A. bicolor* and *A. obscura*. Per species quartet, the *D* statistic was calculated as

$$D = (C_{ABBA} - C_{BABA}) / (C_{ABBA} + C_{BABA}),$$

499 where  $C_{ABBA}$  is the number of sites at which P2 and the third species (P3) share a derived allele  
500 and  $C_{BABA}$  is the number of sites at which P1 and P3 share the derived allele. If sites were not  
501 fixed within species, allele frequencies were taken into account following Martin et al. (2015). In the  
502 absence of introgression,  $D$  is expected to be zero; positive  $D$  values are expected when introgression  
503 took place between P2 and P3, and negative  $D$  values result from introgression between P1 and P3.

504 In addition to the above analyses based on RAD-sequencing derived SNPs, the WGS data for *A.*  
505 *marmorata*, *A. megastoma*, and *A. obscura*, in combination with the available reference-genome as-  
506 sembly for *A. anguilla* (Jansen et al., 2017), allowed us to calculate  $D$  statistics for this species quar-  
507 tet from a fully genomic dataset. To this end, WGS reads of the three species were mapped against  
508 the *A. anguilla* reference assembly using BWA MEM, and sorted and indexed using SAMTOOLS.  
509 Duplicates were marked using PICARD-TOOLS v.2.6.0 (<http://broadinstitute.github.io/picard/>),  
510 and indels were realigned using GATK v.3.4.64 (McKenna et al., 2010). Per-species mean read cov-  
511 erage ( $71.31\times$ ,  $64.80\times$ , and  $48.97\times$  for *A. marmorata*, *A. megastoma*, and *A. obscura*, respectively)  
512 was calculated with BEDTOOLS v.2.26.0 (Quinlan and Hall, 2010). SNP calling was performed  
513 using SAMTOOLS’ “mpileup” command, requiring a minimum mapping quality (MQ) of 30 and  
514 a base quality (BQ) greater than 30, before extracting the consensus sequence using BCFTOOLS  
515 v.1.6. The consensus sequences were converted to FASTQ format via SAMTOOLS’ “vcfutils”  
516 script for bases with a read depth (DP) between 15 and 140, and subsequently used to calculate the  
517 genome-wide  $D$  statistic with *A. obscura* as P1, *A. marmorata* as P2, *A. megastoma* as P3, and *A.*  
518 *anguilla* as the outgroup.

519 The dataset of 619,353 RAD-sequencing derived SNPs (Supplementary Table 1) was further used  
520 to calculate the  $f_4$  statistic (Reich et al., 2009) as a separate measure of introgression signals, for  
521 the same species quartets as the  $D$  statistic. The  $f_4$  statistic is based on allele-frequency differences  
522 between the species pair formed by P1 and P2 and the species pair formed by P3 and the outgroup  
523 (as the  $f_4$  statistic does not assume a rooted topology, P3 and the outgroup form a pair when  
524 P1 and P2 are monophyletic), and like the  $D$  statistic, the  $f_4$  statistic is expected to be zero in  
525 the absence of introgression. We calculated the  $f_4$  statistic with the F4 program v.0.92 (Meyer  
526 et al., 2017). As the distribution of the  $f_4$  statistic across the genome is usually not normally  
527 distributed, block-jackknife resampling is not an appropriate method to assess its significance; thus,  
528 we estimated  $p$ -values based on coalescent simulations as described in Meyer et al. (2017). In brief,  
529 these simulations are also conducted with the F4 program, internally employing fastsimcoal v.2.5.2  
530 (Excoffier et al., 2013) to run each individual simulation. After a burnin period required to adjust  
531 settings for divergence times and population sizes in the simulations, the set of simulations allows  
532 the estimation of the  $p$ -value for the hypothesis of no introgression as the proportion of simulations  
533 that resulted in an  $f_4$  statistic as extreme or more extreme than the  $f_4$  statistic of the empirical  
534 species quartet.

535 The genome-wide consensus sequences for *A. marmorata*, *A. megastoma*, and *A. obscura*, aligned  
536 to the *A. anguilla* reference-genome assembly (Jansen et al., 2017), were further used to test for  
537 introgressed regions on the largest scaffolds of the reference genome (11 scaffolds with lengths greater  
538 than 5 Mbp). To this end, maximum-likelihood phylogenies of the four species were generated with

539 IQ-TREE for blocks of 20,000 bp, incremented by 10,000 bp, with IQ-TREE settings as described  
540 above for species-tree inference.

541 **Estimating effective population sizes.** Distributions of genome-wide coalescence times were  
542 inferred from WGS reads of *A. marmorata*, *A. megastoma*, and *A. obscura* using the pairwise  
543 sequentially Markovian coalescent (PSMC; Li and Durbin, 2011). Heterozygous sites were detected  
544 from consensus sequences in FASTQ format (see above) using the script “fq2psmcf” (Li and Durbin,  
545 2011), applying a window size of 20 bp (1.4% of windows contained more than one heterozygous  
546 site), and a scaffold-good-size of 10,000 bp. The PSMC analyses were run for 30 iterations, setting  
547 the initial effective population size to 15, the initial  $\Theta$  to five, and the time-intervals option to  
548 “ $4 \times 4 + 13 \times 2 + 4 \times 4 + 6$ ”, corresponding to 22 free parameters. To assess confidence intervals, 100  
549 bootstrap replicates were performed using the script “splitfa” (Li and Durbin, 2011). The PSMC  
550 plots were scaled using generation times reported by Jacoby et al. (2015); these were 12 years,  
551 10 years, and 6 years for *A. marmorata*, *A. megastoma*, and *A. obscura*, respectively. Mutation  
552 rates were calculated based on pairwise genetic distances and divergence-time estimates inferred  
553 in our phylogenetic analyses. Uncorrected  $p$ -distances were 1.199% between *A. marmorata* and *A.*  
554 *megastoma*, 1.307% between *A. megastoma* and *A. obscura*, and 1.141% between *A. marmorata*  
555 and *A. obscura*. In combination with the divergence time of *A. megastoma* at 9.6954 Ma and the  
556 divergence time between *A. marmorata* and *A. obscura* at 7.2023 Ma, these distances resulted in  
557 mutation-rate estimates per site per generation of  $r = 8.6 \times 10^{-9}$ ,  $5.6 \times 10^{-9}$ , and  $5.2 \times 10^{-9}$  for *A.*  
558 *marmorata*, *A. megastoma*, and *A. obscura*, respectively.

## 559 Data availability

560 The raw RADseq data will be deposited on the NCBI SRA database. Genome assemblies for *A. mar-*  
561 *marmorata*, *A. megastoma*, and *A. obscura* are deposited on ENA with project number PRJEB32187.  
562 Morphological measurements, SNP datasets in VCF format, and input and output of phylogenetic  
563 analyses will be deposited on Dryad. Code for computational analyses is available from Github  
564 (<http://github.com/mmatschiner/anguilla>).

## 565 References

- 566 Abbott, R. et al. Hybridization and speciation. *J. Evol. Biol.* **26**, 229–246 (2013).
- 567 Albert, V. Jónsson, B. & Bernatchez, L. Natural hybrids in Atlantic eels (*Anguilla anguilla*, *A.*  
568 *rostrata*): evidence for successful reproduction and fluctuating abundance in space and time. *Mol.*  
569 *Ecol.* **15**, 1903–1916 (2006).
- 570 Alexander, D. H. Novembre, J. & Lange, K. Fast model-based estimation of ancestry in unrelated  
571 individuals. *Genome Res.* **19**, 1655–1664 (2009).

- 572 Altschul, S. F. Gish, W. Miller, W. Myers, E. W. & Lipman, D. J. Basic local alignment search  
573 tool. *J. Mol. Biol.* **215**, 403–410 (1990).
- 574 Aoyama, J. Nishida, M. & Tsukamoto, K. Molecular phylogeny and evolution of the freshwater eel,  
575 genus *Anguilla*. *Mol. Phyl. Evol.* **20**, 450–459 (2001).
- 576 Arai, T. *Biology and Ecology of Anguillid Eels* (CRC Press, Boca Raton, Florida, 2016).
- 577 Arcila, D. et al. Genome-wide interrogation advances resolution of recalcitrant groups in the tree of  
578 life. *Nat. Ecol. Evol.* **1**, 1–10 (2017).
- 579 Arntzen, J. W. Jehle, R. Bardakci, F. Burke, T. & Wallis G. P. Asymmetric viability of reciprocal-  
580 cross hybrids between crested and marbled newts (*Triturus cristatus* and *T. marmoratus*). *Evo-  
581 lution* **63**, 1191–1202 (2009).
- 582 Arntzen, J. W. Üzüüm, N. Ajduković, M. D. Ivanović, A. & Wielstra, B. Absence of heterosis in  
583 hybrid crested newts. *PeerJ* **6**, e5317 (2018).
- 584 Avise, J. C. et al. The evolutionary genetic status of Icelandic eels. *Evolution* **44**, 1254–1262 (1990).
- 585 Bateson, W. in *Darwin and Modern Science* (ed Seward, A. C.) 85–101 (Cambridge University  
586 Press, Cambridge, 1909).
- 587 Bolnick, D. I. & Near, T. J. Tempo of hybrid inviability in centrarchid fishes (Teleostei: Centrarchidae). *Evolution* **59**, 1754–1767 (2008).
- 588
- 589 Bouckaert, R. R. et al. BEAST 2.5: An advanced software platform for Bayesian evolutionary  
590 analysis. *PLoS Comput. Biol.* **15**, e1006650 (2019).
- 591 Bryant, D. Bouckaert, R. Felsenstein, J. Rosenberg, N. A. & Choudhury, A. R. Inferring species  
592 trees directly from biallelic genetic markers: Bypassing gene trees in a full coalescent analysis.  
593 *Mol. Biol. Evol.* **29**, 1917–1932 (2012).
- 594 Burgerhout, E. et al. First artificial hybrid of the eel species *Anguilla australis* and *Anguilla anguilla*.  
595 *BMC Dev. Biol.* **11**, 16 (2011).
- 596 Catchen, J. Hohenlohe, P. A. Bassham, S. Amores, A. & Cresko W. A. Stacks: an analysis tool  
597 set for population genomics. *Mol. Ecol.* **22**, 3124–3140 (2013).
- 598 Coyne, J. A. & Orr, H. A. Patterns of speciation in *Drosophila*. *Evolution* **43**, 362–381 (1989).
- 599 Coyne, J. A. & Orr H. A. “Patterns of speciation in *Drosophila*” revisited. *Evolution* **51**, 295–303  
600 (1997).
- 601 Danecek, P. et al. The variant call format and VCFtools. *Bioinformatics* **27**, 2156–2158 (2011).
- 602 Dobzhansky, T. Studies on hybrid sterility. II. Localization of sterility factors in *Drosophila pseu-  
603 doobscura* hybrids. *Genetics* **21**, 113–135 (1936).
- 604 Durand, E. Y. Patterson, N. Reich, D. & Slatkin, M. Testing for ancient admixture between closely  
605 related populations. *Mol. Biol. Evol.* **28**, 2239–2252 (2011).

- 606 Edelman, N. B. et al. Genomic architecture and introgression shape a butterfly radiation. Preprint  
607 at <https://www.biorxiv.org/content/10.1101/466292v1> (2018).
- 608 Excoffier, L. Dupanloup, I. Huerta-Sánchez, E. Sousa, V. & Foll, M. Robust demographic inference  
609 from genomic and SNP data. *PLoS Genet.* **9**, e1003905 (2013).
- 610 Fu, Q. et al. An early modern human from Romania with a recent Neanderthal ancestor. *Nature*  
611 **524**, 216–219 (2015).
- 612 Gagnaire, P.-A. et al. Within population structure highlighted by differential introgression across  
613 semipermeable barriers to gene flow in *Anguilla marmorata*. *Evolution* **65**, 3413–3427 (2011).
- 614 Gagnaire, P.-A. Normandeau, E. & Bernatchez, L. Comparative genomics reveals adaptive protein  
615 evolution and a possible cytonuclear incompatibility between European and American eels. *Mol.*  
616 *Biol. Evol.* **29**, 2909–2919 (2012).
- 617 GBIF.org GBIF Home Page. Available from: <https://www.gbif.org> (2019).
- 618 Green, R. E. et al. A draft sequence of the Neandertal genome. *Science* **328**, 710–722 (2010).
- 619 Gubili, C. et al. High genetic diversity and lack of pronounced population structure in five species  
620 of sympatric Pacific eels. *Fish. Manag. Ecol.* **26**, 31–41 (2019).
- 621 Harris, K. & Nielsen, R. The genetic cost of Neanderthal introgression. *Genetics* **203**, 881–891  
622 (2016).
- 623 Heled, J. & Bouckaert, R. R. Looking for trees in the forest: summary tree from posterior samples.  
624 *BMC Evol. Biol.* **13**, 221 (2013).
- 625 Hench, K. Vargas, M. Höppner, M. P. McMillan, W. O. Puebla, O. Inter-chromosomal coupling  
626 between vision and pigmentation genes during genomic divergence. *Nat. Ecol. Evol.* **3**, 657–667  
627 (2019).
- 628 Hoang, D. T. Vinh, L. S. Flouri, T. Stamatakis, A. & von Haeseler, A. MPBoot: fast phylogenetic  
629 maximum parsimony tree inference and bootstrap approximation. *BMC Evol. Biol.* **18**, 11 (2018).
- 630 Ishikawa, S. Tsukamoto, K. & Nishida, M. Genetic evidence for multiple geographic populations  
631 of the giant mottled eel *Anguilla marmorata* in the Pacific and Indian oceans. *Ichthyol. Res.* **51**,  
632 343–353 (2004).
- 633 Jacobsen, M. W. et al. Speciation and demographic history of Atlantic eels (*Anguilla anguilla* and  
634 *A. rostrata*) revealed by mitogenome sequencing. *Heredity* **113**, 432–442 (2014).
- 635 Jacobsen, M. W. et al. Assessing pre- and post-zygotic barriers between North Atlantic eels (*Anguilla*  
636 *anguilla* and *A. rostrata*). *Heredity* **118**, 266–275 (2017).
- 637 Jacoby, D. M. P. et al. Synergistic patterns of threat and the challenges facing global anguillid eel  
638 conservation. *Glob. Ecol. Conserv.* **4**, 321–333 (2015).
- 639 Jansen, H. J. et al. Rapid de novo assembly of the European eel genome from nanopore sequencing  
640 reads. *Sci. Rep.* **7**, 7213 (2017).

- 641 Juric, I. Aeschbacher, S. & Coop, G. The strength of selection against Neanderthal introgression.  
642 *PLoS Genet.* **12**, e1006340 (2016).
- 643 Katoh, K. & Standley, D. M. MAFFT multiple sequence alignment software version 7: Improve-  
644 ments in performance and usability. *Mol. Biol. Evol.* **30**, 772–780 (2013).
- 645 Kozak, K. M. McMillan, W. O. Joron, M. & Jiggins, C. D. Genome-wide admixture is common  
646 across the *Heliconius* radiation. Preprint at <https://www.biorxiv.org/content/10.1101/414201v1>  
647 (2018).
- 648 Kuroki, M. et al. Offshore spawning for the newly discovered anguillid species *Anguilla luzonensis*  
649 (Teleostei: Anguillidae) in the Western North Pacific. *Pac. Sc.* **66**, 497–507 (2012).
- 650 Lamichhaney, S. et al. Rapid hybrid speciation in Darwin’s finches. *Science* **359**, 224–228 (2018).
- 651 Lawson, D. J. Hellenthal, G. Myers, S. & Falush, D. Inference of population structure using dense  
652 haplotype data. *PLoS Genet.* **8**, e1002453 (2012).
- 653 Li, H. The Sequence Alignment/Map format and SAMtools. *Bioinformatics* **25**, 2078–2079 (2009).
- 654 Li, H. A statistical framework for SNP calling, mutation discovery, association mapping and popula-  
655 tion genetical parameter estimation from sequencing data. *Bioinformatics* **27**, 2987–2993 (2011).
- 656 Li, H. & Durbin, R. Fast and accurate short read alignment with Burrows-Wheeler transform.  
657 *Bioinformatics* **25**, 1754–1760 (2009).
- 658 Li, H. & Durbin, R. Inference of human population history from individual whole-genome sequences.  
659 *Nature* **475**, 493–496 (2011).
- 660 Liu, L. Xi, Z. Wu, S. Davis, C. C. Edwards, S. V. Estimating phylogenetic trees from genome-scale  
661 data. *Ann. New York Acad. Sci.* **1360**, 36–53 (2015).
- 662 Lokman, P. M. & Young, G. Induced spawning and early ontogeny of New Zealand freshwater eels.  
663 *New Zealand J. Mar. Freshw. Res.* **34**, 135–145 (2000).
- 664 Malinsky, M. et al. Whole-genome sequences of Malawi cichlids reveal multiple radiations intercon-  
665 nected by gene flow. *Nat. Ecol. Evol.* **2**, 1940–1955 (2018a).
- 666 Malinsky, M. Trucchi, E. Lawson, D. J. & Falush, D. RADpainter and fineRADstructure: Popula-  
667 tion inference from RADseq data. *Mol. Biol. Evol.* **35**, 1284–1290 (2018b).
- 668 Mallet, J. Hybridisation as an invasion of the genome. *Trends Ecol. Evol.* **20**, 229–237 (2005).
- 669 Mallet, J. Hybrid speciation. *Nature* **446**, 279–283 (2007).
- 670 Mallet, J. Beltrán, M. Neukirchen, W. & Linares, M. Natural hybridization in heliconiine butter-  
671 flies: the species boundary as a continuum. *BMC Evol. Biol.* **7**, 28 (2007).
- 672 Marques, D. A. Meier, J. I. & Seehausen, O. A combinatorial view on speciation and adaptive  
673 radiation. *Trends Ecol. Evol.* Advance access at [https://www.cell.com/trends/ecology-evolution/](https://www.cell.com/trends/ecology-evolution/fulltext/S0169-5347(19)30055-2)  
674 [fulltext/S0169-5347\(19\)30055-2](https://www.cell.com/trends/ecology-evolution/fulltext/S0169-5347(19)30055-2) (2019).

- 675 Martin, S. H. Davey, J. W. & Jiggins, C. D. Evaluating the use of ABBA-BABA statistics to locate  
676 introgressed loci. *Mol. Biol. Evol.* **32**, 244–257 (2015).
- 677 Martin, S. H. Davey, J. W. Salazar, C. & Jiggins, C. D. Recombination rate variation shapes  
678 barriers to introgression across butterfly genomes. *PLoS Biol.* **17**, e2006288 (2019).
- 679 Matschiner, M. Fitchi: haplotype genealogy graphs based on the Fitch algorithm. *Bioinformatics*  
680 **32**, 1250–1252 (2016).
- 681 Matschiner, M. et al. Bayesian phylogenetic estimation of clade ages supports trans-Atlantic dis-  
682 persal of cichlid fishes. *Syst. Biol.* **66**, 3–22 (2017).
- 683 McKenna, A. et al. The Genome Analysis Toolkit: a MapReduce framework for analyzing next-  
684 generation DNA sequencing data. *Genome Res.* **20**, 1297–1303 (2010).
- 685 Meier, J. I. et al. Ancient hybridization fuels rapid cichlid fish adaptive radiations. *Nat. Commun.*  
686 **8**, 14363 (2017).
- 687 Meyer, B. S. Matschiner, M. & Salzburger, W. Disentangling incomplete lineage sorting and intro-  
688 gression to refine species-tree estimates for Lake Tanganyika cichlid fishes. *Syst. Biol.* **66**, 531–550  
689 (2017).
- 690 Miller, J. R. et al. Aggressive assembly of pyrosequencing reads with mates. *Bioinformatics* **24**,  
691 2818–2824 (2008).
- 692 Minegishi, Y. et al. Molecular phylogeny and evolution of the freshwater eels genus *Anguilla* based  
693 on the whole mitochondrial genome sequences. *Mol. Phyl. Evol.* **34**, 134–146 (2005).
- 694 Minegishi, Y. Aoyama, J. & Tsukamoto, K. Multiple population structure of the giant mottled eel,  
695 *Anguilla marmorata*. *Mol. Ecol.* **17**, 3109–3122 (2008).
- 696 Minh, B. Q. Hahn, M. & Lanfear, R. New methods to calculate concordance factors for phyloge-  
697 nomic datasets. Preprint at <https://www.biorxiv.org/content/10.1101/487801v1> (2018).
- 698 Muller, H. J. Isolating mechanisms, evolution and temperature. *Biol. Symp.* **6**, 71–125 (1942).
- 699 Müller, T. et al. Artificial hybridization of Japanese and European eel (*Anguilla japonica* × *A. an-*  
700 *guilla*) by using cryopreserved sperm from freshwater reared males. *Aquaculture* **350–353**, 130–133  
701 (2012).
- 702 Musilova, Z. et al. Vision using multiple distinct rod opsins in deep-sea fishes. *Science* **364**, 588–592  
703 (2019).
- 704 Nelson, J. S. Grande, T. C. & Wilson, M. V. H. *Fishes of the World*, 5th ed. (John Wiley & Sons,  
705 Inc. Hoboken, New Jersey, 2018).
- 706 Nguyen, L. T. Schmidt, H. A. von Haeseler, A. & Minh, B. Q. IQ-TREE: A fast and effective  
707 stochastic algorithm for estimating maximum-likelihood phylogenies. *Mol. Biol. Evol.* **32**, 268–  
708 274 (2015).



- 
- 709 Okamura, A. et al. Artificial hybrid between *Anguilla anguilla* and *A. japonica*. *J. Fish Biol.* **64**,  
710 1450–1454 (2004).
- 711 Orr, H. A. & Turelli, M. The evolution of postzygotic isolation: Accumulating Dobzhansky-Muller  
712 incompatibilities. *Evolution* **55**, 1085–1094 (2001).
- 713 Patterson, N, Price, A. L. & Reich D. Population structure and eigenanalysis. *PLoS Genet.* **2**, e190  
714 (2006).
- 715 Peterson, B. K. Weber, J. N. Kay, E. H. Fisher, H. S. & Hoekstra, H. E. Double digest RADseq: An  
716 inexpensive method for de novo SNP discovery and genotyping in model and non-model species.  
717 *PLoS ONE* **7**, e37135 (2012).
- 718 Prager, E. M. & Wilson, A. C. Slow evolutionary loss of the potential for interspecific hybridization  
719 in birds: A manifestation of slow regulatory evolution. *Proc. Natl. Acad. Sci. USA* **72**, 200–204  
720 (1975).
- 721 Price, T. D. & Bouvier, M. The evolution of F1 postzygotic incompatibilities in birds. *Evolution*  
722 **56**, 2083–2089 (2002).
- 723 Pujolar, J. M. et al. Assessing patterns of hybridization between North Atlantic eels using diagnostic  
724 single-nucleotide polymorphisms. *Heredity* **112**, 627–637 (2014).
- 725 Pujolar, J. M. & Maes, G. in *Biology and Ecology of Anguillid Eels* (ed Arai, T.) 36–51 (CRC Press,  
726 Boca Raton, Florida, 2016).
- 727 Purcell, S. et al. PLINK: a tool set for whole-genome association and population-based linkage  
728 analyses. *Am. J. Human Genet.* **81**, 559–575 (2007).
- 729 Quinlan, A. R. & Hall, I. M. BEDTools: a flexible suite of utilities for comparing genomic features.  
730 *Bioinformatics* **26**, 841–842 (2010).
- 731 Rabosky, et al. An inverse latitudinal gradient in speciation rate for marine fishes. *Nature* **559**,  
732 392–395 (2018).
- 733 Rambaut, A. Drummond, A. J. Xie, D. Baele, G. & Suchard, M. A. Posterior summarization in  
734 Bayesian phylogenetics using Tracer 1.7. *Syst. Biol.* **67**, 901–904 (2018).
- 735 Reich, D. Thangaraj, K. Patterson, N. Price, A. L. & Singh, L. Reconstructing Indian population  
736 history. *Nature* **461**, 489–494 (2009).
- 737 Rieseberg, L. H. Archer M. A. & Wayne R. K. Transgressive segregation, adaptation and speciation.  
738 *Heredity* **83**, 363–372 (1999).
- 739 Rochette, N. C. & Catchen, J. M. Deriving genotypes from RAD-seq short-read data using Stacks.  
740 *Nat. Protoc.* **12**, 2640–2659 (2017).
- 741 Runemark, A. et al. Variation and constraints in hybrid genome formation. *Nat. Ecol. Evol.* **2**,  
742 549–556 (2018).

- 743 Sambrook, J. Fritsch, E. F. & Maniatis, T. *Molecular Cloning: A Laboratory Manual*, 2nd ed. (Cold  
744 Spring Harbor Laboratory Press, Cold Spring Harbor, NY, 1989).
- 745 Schabetsberger, R. et al. Genetic and migratory evidence for sympatric spawning of tropical Pacific  
746 eels from Vanuatu. *Marine Ecol. Prog. Ser.* **521**, 171–187 (2015).
- 747 Schabetsberger, R. et al. Hydrographic features of anguillid spawning areas: Potential signposts for  
748 migrating eels. *Mar. Ecol. Prog. Ser.* **554**, 141–155 (2016).
- 749 Schumer, M. Cui, R. Powell, D. L. Rosenthal, G. G. & Andolfatto, P. Ancient hybridization and  
750 genomic stabilization in a swordtail fish. *Mol. Ecol.* **25**, 2661–2679 (2016).
- 751 Stamatakis, A. RAxML version 8: a tool for phylogenetic analysis and post-analysis of large phy-  
752 logenies. *Bioinformatics* **30**, 1312–1313 (2014).
- 753 Stange, M. Sánchez-Villagra, M. R. Salzburger, W. & Matschiner, M. Bayesian divergence-time  
754 estimation with genome-wide SNP data of sea catfishes (Ariidae) supports Miocene closure of the  
755 Panamanian Isthmus. *Syst. Biol.* **67**, 681–699 (2018).
- 756 Stelkens, R. B. Schmid, C. Selz, O. & Seehausen, O. Phenotypic novelty in experimental hybrids is  
757 predicted by the genetic distance between species of cichlid fish. *BMC Evol. Biol.* **9**, 283 (2009).
- 758 Stelkens, R. B. Schmid, C. & Seehausen, O. Hybrid breakdown in cichlid fish. *PLoS ONE* **10**,  
759 e0127207 (2015).
- 760 Stelkens, R. B. & Seehausen, O. Genetic distance between species predicts novel trait expression in  
761 their hybrids. *Evolution* **63**, 884–897 (2009).
- 762 Stelkens, R. B. Young, K. A. & Seehausen, O. The accumulation of reproductive incompatibilities  
763 in African cichlid fish. *Evolution* **64**, 617–633 (2010).
- 764 Taylor, S. A. & Larson E. L. Insights from genomes into the evolutionary importance and prevalence  
765 of hybridisation in nature. *Nature Ecol. Evol.* **3**, 170–177 (2019).
- 766 Teng, H.-Y. Lin, Y.-S. & Tzeng C.-S. A new *Anguilla* species and a reanalysis of the phylogeny of  
767 freshwater eels. *Zool. Studies* **48**, 808–822 (2009).
- 768 Tørresen, O. K. et al. An improved genome assembly uncovers prolific tandem repeats in Atlantic  
769 cod. *BMC Genomics* **18**, 95 (2017).
- 770 Tseng, M.-C. in *Biology and Ecology of Anguillid Eels* (ed Arai, T.) 21–35 (CRC Press, Boca Raton,  
771 Florida, 2016).
- 772 Turelli, M. & Moyle L. C. Asymmetric postmating isolation: Darwin’s corollary to Haldane’s rule.  
773 *Genetics* **176**, 1059–1088 (2007).
- 774 Walker, B. J. et al. Pilon: An integrated tool for comprehensive microbial variant detection and  
775 genome assembly improvement. *PLoS ONE* **9**, e112963 (2014).
- 776 Watanabe, S. Aoyama, J. & Tsukamoto, K. Reexamination of Ege’s (1939) use of taxonomic char-  
777 acters of the genus *Anguilla*. *Bull. Mar. Sci.* **74**, 337–351 (2004).

- 778 Watanabe, S. et al. Evidence of population structure in the giant mottled eel, *Anguilla marmorata*,  
779 using total number of vertebrae. *Copeia* **2008**, 680–688 (2008).
- 780 Watanabe, S. Miller, M. J. Aoyama, J. & Tsukamoto, K. Morphological and meristic evaluation  
781 of the population structure of *Anguilla marmorata* across its range. *J. Fish Biol.* **74**, 2069–2093  
782 (2009).
- 783 Waterhouse, R. M. et al. BUSCO applications from quality assessments to gene prediction and  
784 phylogenomics. *Mol. Biol. Evol.* **35**, 543–548 (2018).
- 785 Watterson, G. A. On the number of segregating sites in genetical models without recombination.  
786 *Theor. Popul. Biol.* **7**, 256–276 (1975).
- 787 Wielgoss, S. Meyer, A. Gilabert, A. & Wirth T. Introgressive hybridization and latitudinal admix-  
788 ture clines in North Atlantic eels. *BMC Evol. Biol.* **14**, 61 (2014).
- 789 Wiley, C. Qvarnström, A. Andersson, G. Borge, T. & Saetre, G.-P. Postzygotic isolation over  
790 multiple generations of hybrid descendents in a natural hybrid zone: how well do single-generation  
791 estimates reflect reproductive isolation? *Evolution* **63**, 1731–1739 (2009).

## 792 **Acknowledgements**

793 Funding for this study was provided by the Austrian Science Fund (FWF, project P28381-B29 to  
794 R.Sc.) and the Norwegian Research Council (FRIPRO project 275869 to M.M.). We thank Anthony  
795 Acou, Davi Boseto, Donna Kalfatak, Rilloy Leaana, Finn Økland, Christine Pöllabauer, Alexander  
796 Scheck, Ursula Sichrowsky, and Meelis Tambets for assistance with field work, Franz Gassner for  
797 help with data analysis, and Ian Goodhead for his support in the laboratory. We further thank Olaf  
798 L. F. Weyl and acknowledge the DST/NRF South African Research Chair in Inland Fisheries and  
799 Freshwater Ecology (Grant No 110507) and the NRF-SAIAB Collections Platform for the provision  
800 of genetic tissue samples. All computational work was performed on the Abel Supercomputing  
801 Cluster (Norwegian Metacenter for High-Performance Computing (NOTUR) and the University of  
802 Oslo), operated by the Research Computing Services group at USIT, the University of Oslo IT  
803 Department. Peter Comes provided valuable comments on the manuscript.

## 804 **Author contributions**

805 R.Sc. and R.J. conceived the project. R.Sc., R.J., C.G., M.M., J.M.I.B., and R.So. planned and  
806 oversaw the project. R.Sc., C.G., Y.-S.H., and E.F. contributed specimens. C.G., R.J., and R.Sc.  
807 organized RAD sequencing. S.W. performed morphological analyses. J.M.I.B. and B.E. prepared  
808 genomic datasets. O.K.T. performed genome assembly. M.M. and J.M.I.B. performed population  
809 genomic and phylogenomic analyses. M.M. and J.M.I.B. prepared the figures. M.M. and J.M.I.B.  
810 wrote the manuscript with input from all authors.
